# Supplementary material for: HEXIM1 inter-monomer autoinhibition governs 7SK RNA binding specificity and P-TEFb inactivation
Source: Nat Commun. 2026 Jan 15;17:1570. doi: 10.1038/s41467-026-68285-8 (PMC12901311; doi:10.1038/s41467-026-68285-8)
Supplement: Supplementary file 4 — Source data [file 41467_2026_68285_MOESM4_ESM.xlsx]

## Sheet: Fig2C, SL1-dI CSP
SL1-dI CSP 12262024		SL1-dI 0.26mM 10C 800MHz NOESY-11Echo 150mM KCl NMR buffer															SL1-dI 0.15mM + BR-L-AR 0.18mM 10C 800MHz NOESY-11Echo								proton CSPs									No Space
Numbers updated from resonance list with 3 digit after decimal point			H1	H1'	H2	H2'	H22	H3	H3'	H41	H42	H5	H5'	H6	H8			H1	H1'	H2	H3	H5	H6	H8		∆H1	∆H1'	∆H2	∆H3	∆H5	∆H6	∆H8			∆H1	∆H1'	∆H2	∆H3	∆H5	∆H6	∆H8
+ BR-L-AR		G35'	-	5.763	-	-	-	-	-	-	-	-	-	-	8.117																			G35'
Fig. 2C			-	0	-	-	-	-	-	-	-	-	-	-	0.0014																			G36'	0.018
		G36'	13.426	-	-	-	-	-	-	-	-	-	-	-	-		G36'	13.408	-	-	-	-	-	-	G36'	0.018								C37					0.069	0.02
			0.0004	-	-	-	-	-	-	-	-	-	-	-	-			0.004	-	-	-	-	-	-										C38					0.014	0.01
		C37	-	-	-	-	-	-	-	8.614	6.901	5.196	-	7.67	-		C37	-	-	-	-	5.127	7.69	-	C37					0.069	0.02			A39
			-	-	-	-	-	-	-	0	0	0.006	-	0	-			-	-	-	-	0	0	-										U40					0.051	0.008
		C38	-	-	-	-	-	-	-	8.241	6.89	5.478	-	7.611	-		C38	-	-	-	-	5.492	7.601	-	C38					0.014	0.01			U41					0.115	0.005
			-	-	-	-	-	-	-	0	0	0	-	0.002	-			-	-	-	-	0	0	-										G42	0.077
		A39	-	-	6.909	-	-	-	-	-	-	-	-	-	7.853										A39									A43			0.114
			-	-	0	-	-	-	-	-	-	-	-	-	0																			U44				0.11
		U40	-	-	-	-	-	10.385	-	-	-	5.409	-	7.455	-		U40	-	-	-	-	5.46	7.463	-	U40					0.051	0.008			C45					0.036	0.041
			-	-	-	-	-	0.0019	-	-	-	0.011	-	0.0045	-			-	-	-	-	0	0	-										G46	0.059
		U41	-	-	-	-	-	11.716	-	-	-	5.808	-	7.861	-		U41	-	-	-	-	5.923	7.856	-	U41					0.115	0.005			C47					0.034	0.014
			-	-	-	-	-	0.0024	-	-	-	0	-	0	-			-	-	-	-	0	0	-										C48					0.001	0.004
		G42	12.482	-	-	4.88	-	-	-	-	-	-	-	-	7.773		G42	12.559	-	-	-	-	-	-	G42	0.077								U49'					0.015	0.015
			0.0018	-	-	0	-	-	-	-	-	-	-	-	0			0.012	-	-	-	-	-	-										U50'					0.005	0.005
		A43	-	5.874	7.776	-	-	-	-	-	-	-	-	-	7.924		A43	-	-	7.89	-	-	-	-	A43			0.114						C51'					0.013
			-	0	0	-	-	-	-	-	-	-	-	-	0.0085			-	-	0	-	-	-	-										G52'	0.016	0.008					0.01
		U44	-	-	-	-	-	14.125	-	-	-	4.941	-	7.598	-		U44	-	-	-	14.235	-	-	-	U44				0.11					G60	0.075
			-	-	-	-	-	0.0023	-	-	-	0.0065	-	0.0087	-			-	-	-	0.023	-	-	-										G61	0.021
		C45	-	-	-	-	-	-	-	8.292	6.81	5.558	-	7.667	-		C45	-	-	-	-	5.522	7.708	-	C45					0.036	0.041			C62
			-	-	-	-	-	-	-	0	0	0	-	0.0066	-			-	-	-	-	0	0	-										U63					0.081	0.07
		G46	12.883	-	-	-	-	-	-	-	-	-	-	-	7.488		G46	12.942	-	-	-	-	-	-	G46	0.059								G64	0.239
			0.0005	-	-	-	-	-	-	-	-	-	-	-	0.0023			0.0005	-	-	-	-	-	-										A65			0.106
		C47	-	-	-	-	-	-	-	8.59	6.911	5.216	-	7.734	-		C47	-	-	-	-	5.182	7.748	-	C47					0.034	0.014			U66				0.081
			-	-	-	-	-	-	-	0	0	0.0065	-	0.0045	-			-	-	-	-	0	0	-										C67					0.1	0.096
		C48	-	-	-	-	-	-	-	8.483	6.883	5.437	-	7.606	-		C48	-	-	-	-	5.438	7.602	-	C48					0.001	0.004			U68					0.123	0.029
			-	-	-	-	-	-	-	0	0	0.005	-	0	-			-	-	-	-	0	0	-										G69	0.024
		U49'	-	-	-	3.736	-	-	-	-	-	5.748	-	7.723	-		U49'	-	-	-	-	5.733	7.708	-	U49'					0.015	0.015			G70	0.029
			-	-	-	0	-	-	-	-	-	0	-	0	-			-	-	-	-	0	0	-										C71'					0.033	0.005
		U50'	-	-	-	-	-	11.725	-	-	-	5.806	-	7.969	-		U50'	-	-	-	-	5.801	7.964	-	U50'					0.005	0.005
			-	-	-	-	-	0.002	-	-	-	0	-	0.0013	-			-	-	-	-	0	0.001	-										AVG	0.074	0.008	0.11	0.095	0.0492857	0.0247692	0.01
		C51'	-	5.909	-	-	-	-	-	-	-	6.072	-	7.638	-		C51'	-	-	-	-	6.059	-	-	C51'					0.013				STD	0.0775177		0.00565685	0.0212132	0.0415348	0.0284873
			-	0	-	-	-	-	-	-	-	0.0075	-	0.0085	-			-	-	-	-	0	-	-										AVG+STD	0.151518		0.115657	0.116213	0.0908206	0.0532565
		G52'	9.823	5.926	-	4.835	-	-	5.582	-	-	-	-	-	7.827		G52'	9.807	5.918	-	-	-	-	7.817	G52'	0.016	0.008					0.01		AVG+0.5STD	0.112759		0.112828	0.105607	0.0700531	0.0390129
			0.0004	0	-	0.0025	-	-	0	-	-	-	-	-	0.001			0.003	0	-	-	-	-	0
		G60	12.883	-	-	4.406	-	-	-	-	-	-	-	-	8.271		G60	12.808	-	-	-	-	-	-	G60	0.075								AVG for all	0.0475952
			0.0039	-	-	0	-	-	-	-	-	-	-	-	0.0012			0.0005	-	-	-	-	-	-										STD for all	0.0485537
		G61	13.155	5.751	-	-	-	-	-	-	-	-	3.965	-	7.167		G61	13.134	-	-	-	-	-	-	G61	0.021								AVG+STD for all	0.096149
			0.0015	0	-	-	-	-	-	-	-	-	0	-	0.0024			0.003	-	-	-	-	-	-										AVG+0.5STD for all	0.0718721
		C62	-	-	-	-	-	-	-	-	-	5.172	-	7.439	-										C62
			-	-	-	-	-	-	-	-	-	0	-	0.0029	-
		U63	-	-	-	-	-	9.652	-	-	-	5.778	-	7.831	-		U63	-	-	-	-	5.859	7.761	-	U63					0.081	0.07
			-	-	-	-	-	0	-	-	-	0	-	0	-			-	-	-	-	0	0	-
		U63'	-	-	-	-	-	10.639	-	-	-	-	-	-	-
			-	-	-	-	-	0.0045	-	-	-	-	-	-	-
		G64	12.296	5.727	-	-	-	-	-	-	-	-	-	-	-		G64	12.057	-	-	-	-	-	-	G64	0.239
			0.005	0	-	-	-	-	-	-	-	-	-	-	-			0.001	-	-	-	-	-	-
		A65	-	5.989	7.766	-	-	-	-	-	-	-	-	-	7.966		A65	-	-	7.872	-	-	-	-	A65			0.106
			-	0	0	-	-	-	-	-	-	-	-	-	0.0005			-	-	0	-	-	-	-
		U66	-	-	-	-	-	14.067	-	-	-	4.941	-	7.608	-		U66	-	-	-	14.148	-	-	-	U66				0.081
			-	-	-	-	-	0.001	-	-	-	0.0065	-	0	-			-	-	-	0.0045	-	-	-
		C67	-	-	-	-	-	-	-	8.243	6.905	5.499	-	7.596	-		C67	-	-	-	-	5.399	7.692	-	C67					0.1	0.096
			-	-	-	-	-	-	-	0	0	0	-	0	-			-	-	-	-	0	0	-
		U68	-	-	-	-	-	11.842	-	-	-	5.506	-	7.789	-		U68	-	-	-	-	5.629	7.818	-	U68					0.123	0.029
			-	-	-	-	-	0.0017	-	-	-	0	-	0.013	-			-	-	-	-	0	0	-
		G69	12.162	5.706	-	-	-	-	-	-	-	-	-	-	7.797		G69	12.138	-	-	-	-	-	-	G69	0.024
			0.0007	0	-	-	-	-	-	-	-	-	-	-	0			0.011	-	-	-	-	-	-
		G70	13.22	5.696	-	-	8.616	-	-	-	-	-	-	-	7.317		G70	13.191	-	-	-	-	-	-	G70	0.029
			0.0083	0	-	-	0	-	-	-	-	-	-	-	0.0008			0.0005	-	-	-	-	-	-
		C71'	-	-	-	-	-	-	-	8.614	6.943	5.155	-	7.59	-		C71'	-	-	-	-	5.122	7.585	-	C71'					0.033	0.005
			-	-	-	-	-	-	-	0	0	0.0055	-	0.003	-			-	-	-	-	0	0	-
																									AVG	0.062	0.008	0.11	0.0955	0.0492857	0.0247692	0.01
																									STD	0.0707089		0.00565685	0.0205061	0.0415348	0.0284873
																									AVG+STD	0.132709		0.115657	0.116006	0.0908206	0.0532565

## Sheet: Fig2C, SL1-dI-deltaU CSP
SL1-dI-∆U CSP 01152017		SL1-dI-∆U 0.15mM 15C 600MHz NOESY-11Echo 0mM KCl NMR buffer										SL1-dI-∆U 0.3mM + BR-L-AR 0.2mM 15C 600MHz NOESY-11Echo 0mM KCl NMR buffer										proton CSPs									proton CSPs	no space								Put additional nts in to illustrate deletion from d5
Numbers updated from resonance list with 3 digit after decimal point			H1	H1'	H2	H3	H41	H5	H6	H8			H1	H1'	H2	H3	H41	H5	H6	H8		∆H1	∆H1'	∆H2	∆H3	∆H5	∆H6	∆H8			∆H1	∆H1'	∆H2	∆H3	∆H5	∆H6	∆H8			∆H1	∆H1'	∆H2	∆H3	∆H5	∆H6	∆H8
+ BR-L-AR		ULoop	-	-	-	11.658	-	-	-	-		ULoop	-	-	-	11.672	-	-	-	-										G35'									G35'
Fig. 2C		G35'	12.31	-	-	-	-	-	-	-																				G36'	0.003								G36'	0.003
		G36'	13.43	-	-	-	-	-	-	-		G36'	13.433	-	-	-	-	-	-	-	G36'	0.003								C37					0.042	0.033			C37					0.042	0.033
		C37	-	-	-	-	8.607	5.234	7.68	-		C37	-	-	-	-	8.523	5.276	7.713	-	C37					0.042	0.033			C38									C38
		C38	-	-	-	-	8.233	5.523	7.619	-		C38	-	-	-	-	8.551	-	-	-	C38									A39									A39
		A39	-	-	6.999	-	-	-	-	-																				U40					0.092	0.125			U40					0.092	0.125
		U40	-	-	-	10.721	-	5.424	7.488	-		U40	-	-	-	-	-	5.516	7.363	-	U40					0.092	0.125			U41									U41
		U41	-	-	-	11.95	-	5.836	7.872	-																				G42	0.155								G42	0.155
		G42	12.52	-	-	-	-	-	-	-		G42	12.675	-	-	-	-	-	-	-	G42	0.155								A43			0.14						A43			0.14
		A43	-	5.91	7.819	-	-	-	-	7.967		A43	-	-	7.959	-	-	-	-	-	A43			0.14						U44				0.067	0.095	0.024			U44				0.067	0.095	0.024
		U44	-	-	-	14.233	-	5.008	7.658	-		U44	-	-	-	14.3	-	5.103	7.634	-	U44				0.067	0.095	0.024			C45									C45
		C45	-	-	-	-	8.372	5.53	7.659	-		C45	-	-	-	-	8.327	-	-	-	C45									G46	0.099								G46	0.099
		G46	12.81	-	-	-	-	-	-	-		G46	12.711	-	-	-	-	-	-	-	G46	0.099								C47									C47
		C47	-	-	-	-	8.514	5.466	7.619	-		C47	-	-	-	-	8.477	-	-	-	C47									C48									C48
		U48'	-	-	-	11.658	-	5.725	7.739	-		U48'	-	-	-	11.672	-	5.716	7.742	-	U48'				0.014	0.009	0.003			U48'				0.014	0.009	0.003			U49'				0.014	0.009	0.003
		U49'	-	-	-	-	-	5.843	8.004	-		U49'	-	-	-	-	-	5.835	7.996	-	U49'					0.008	0.008			U49'					0.008	0.008			U50'					0.008	0.008
		C50'	-	6.079	-	-	-	6.112	7.673	-		C50'	-	6.088	-	-	-	6.107	7.667	-	C50'		0.009			0.005	0.006			C50'		0.009			0.005	0.006			C51'		0.009			0.005	0.006
		C51'	-	-	-	-	-			-		C51'	-	-	-	-	-			-	C51'									G51'	0.004								G52'	0.004
		G51'	9.868	-	-	-	-	-	-	-		G51'	9.872	-	-	-	-	-	-	-	G51'	0.004								G61	0.017	0.005					0.006		G60
		G61	13.385	5.947	-	-	-	-	-	7.848		G61	13.368	5.942	-	-	-	-	-	7.842	G61	0.017	0.005					0.006		C62					0.049	0.014			G61	0.017	0.005					0.006
		C62	-	-	-	-	8.543	5.156	7.449	-		C62	-	-	-	-	8.457	5.107	7.463	-	C62					0.049	0.014			G64	0.1								C62					0.049	0.014
		G64	12.09	-	-	-	-	-	-	-		G64	11.99	-	-	-	-	-	-	-	G64	0.1								A65			0.038						U63
		A65	-	-	7.751	-	-	-	-	-		A65	-	-	7.789	-	-	-	-	-	A65			0.038						U66				0.116	0.11	0.004			G64	0.1
		U66	-	-	-	14.088	-	4.993	7.587	-		U66	-	-	-	14.204	-	5.103	7.591	-	U66				0.116	0.11	0.004			C67									A65			0.038
		C67	-	-	-	-	8.289	5.523	7.619	-		C67	-	-	-	-	8.06	-	-	-	C67									U68					0.134	0.049			U66				0.116	0.11	0.004
		U68	-	-	-	-	-	5.531	7.814	-		U68	-	-	-	-	-	5.397	7.863	-	U68					0.134	0.049			G69	0.027								C67
		G69	12.182	5.745	-	-	-	-	-	-		G69	12.155	-	-	-	-	-	-	-	G69	0.027								G70	0.061								U68					0.134	0.049
		G70	13.237	5.737	-	-	-	-	-	7.353		G70	13.176	-	-	-	-	-	-	-	G70	0.061								C71'					0.097	0.006			G69	0.027
		C71'	-	-	-	-	8.619	5.199	7.604	-		C71'	-	-	-	-	8.639	5.296	7.61	-	C71'					0.097	0.006												G70	0.061
																														AVG for all	AVG	0.0492778							C71'					0.097	0.006
																															STD for all	0.0483544							C72'
																															AVG+STD for all	0.0976322
																															AVG+0.5STD for all	0.073455

## Sheet: Fig2E_BR-L-AR-CSP_SL1-dI-deltaU
	Free BR-L-AR				SL1_dI-deltaU bound BR-L-AR
	Assignment	w1	w2		Assignment	w1	w2		DeltaN	DeltaHN		Delta_combine		Residue	Number	Continuous ResNO	Number	Delta_combine
																142
	Q144N-HN	121.699	8.527		Q144N-HN	121.633	8.429		-0.066	-0.098		0.101322		Q	144	143
	Q145N-HN	121.727	8.453		Q145N-HN	121.487	8.507		-0.24	0.054		0.108033		Q	145	144	144	0.101322
	R146N-HN	122.411	8.371		R146N-HN	122.359	8.363		-0.052	-0.008		0.0217947		R	146	145	145	0.108033
	Q147N-HN	121.727	8.453		Q147N-HN	121.702	8.467		-0.025	0.014		0.0170587		Q	147	146	146	0.0217947
	L148N-HN	123.891	8.312		L148N-HN	123.668	8.297		-0.223	-0.015		0.0882259		L	148	147	147	0.0170587
	G149N-HN	109.605	8.407		G149N-HN	109.749	8.425		0.144	0.018		0.0589565		G	149	148	148	0.0882259
	K150N-HN	120.944	8.139		K150N-HN	121.007	8.082		0.063	-0.057		0.0620668		K	150	149	149	0.0589565
	K151N-HN	120.627	8.471		K151									K	151	150	150	0.0620668
	K152N-HN	122.364	8.344		K152N-HN	123.659	8.418		1.295	0.074		0.510278		K	152	151	151
	R154N-HN	123.371	8.521		R154									R	154	152	152	0.510278
	R155N-HN	123.287	8.533		R155									R	155	153
	S158N-HN	116.663	8.447		S158N-HN	116.996	8.551		0.333	0.104		0.166346		S	158	154	154
	K159N-HN	123.675	8.453		K159									K	159	155	155
	K160N-HN	122.934	8.289		K160									K	160	156
	K161N-HN	122.232	8.274		K161									K	161	157
	R162N-HN	122.745	8.331		R162									R	162	158	158	0.166346
	W164N-HN	123.22	8.223		W164									W	164	159	159
	K165N-HN	124.703	7.854		K165N-HN	124.382	7.71		-0.321	-0.144		0.190783		K	165	160	160
	Y167N-HN	120.37	8.048		Y167									Y	167	161	161
	Y168N-HN	116.114	7.611		Y168									Y	168	162	162
	K169N-HN	120.993	7.672		K169N-HN	120.654	7.586		-0.339	-0.086		0.157683		K	169	163
	L170N-HN	122.006	7.571		L170N-HN	121.621	7.491		-0.385	-0.08		0.170089		L	170	164	164
	T171N-HN	113.743	8.57		T171N-HN	113.53	8.494		-0.213	-0.076		0.11257		T	171	165	165	0.190783
	W172N-HN	122.005	8.673		W172N-HN	121.941	8.619		-0.064	-0.054		0.0594861		W	172	166
	E173N-HN	119.152	8.424		E173N-HN	119.029	8.394		-0.123	-0.03		0.0565651		E	173	167	167
	E174N-HN	120.079	7.72		E174N-HN	119.973	7.695		-0.106	-0.025		0.0482998		E	174	168	168
	K175N-HN	122.025	8.596		K165									K	165	169	169	0.157683
	K176N-HN	119.249	7.804		K176N-HN	119.133	7.769		-0.116	-0.035		0.0571866		K	176	170	170	0.170089
	K177N-HN	118.956	7.601		K177N-HN	118.97	7.572		0.014	-0.029		0.0295092		K	177	171	171	0.11257
	F178N-HN	121.401	8.188		F178N-HN	121.504	8.188		0.103	0		0.0401568		F	178	172	172	0.0594861
	D179N-HN	121.256	8.672		D179N-HN	121.214	8.668		-0.042	-0.004		0.0168561		D	179	173	173	0.0565651
	E180N-HN	121.401	8.188		E180N-HN	121.323	8.167		-0.078	-0.021		0.0369563		E	180	174	174	0.0482998
	K181N-HN	120.11	8.001		K181N-HN	120.151	7.986		0.041	-0.015		0.0219206		K	181	175	175
	Q182N-HN	119.326	8.178		Q182N-HN	119.176	8.163		-0.15	-0.015		0.0603738		Q	182	176	176	0.0571866
	S183N-HN	115.968	8.15		S183N-HN	115.958	8.122		-0.01	-0.028		0.0282701		S	183	177	177	0.0295092
	L184N-HN	123.499	8.016		L184N-HN	123.437	8.002		-0.062	-0.014		0.0279336		L	184	178	178	0.0401568
	R185N-HN	120.452	8.008		R185N-HN	120.374	7.973		-0.078	-0.035		0.0463656		R	185	179	179	0.0168561
	A186N-HN	124.131	8.504		A186									A	186	180	180	0.0369563
	S187N-HN	114.04	8.107		S187N-HN	113.98	8.1		-0.06	-0.007		0.0244172		S	187	181	181	0.0219206
	R188N-HN	123.151	8.09		R188N-HN	123.299	8.056		0.148	-0.034		0.0669732		R	188	182	182	0.0603738
	I189N-HN	120.568	8.01		I189N-HN	120.623	7.996		0.055	-0.014		0.0256086		I	189	183	183	0.0282701
	R190N-HN	122.515	8.109		R190									R	190	184	184	0.0279336
	A191N-HN	122.331	8.143		A191N-HN	122.21	8.11		-0.121	-0.033		0.0575711		A	191	185	185	0.0463656
	E192N-HN	119.052	8.285		E192N-HN	118.986	8.271		-0.066	-0.014		0.0292935		E	192	186	186
	M193N-HN	119.235	8.112		M193N-HN	119.222	8.099		-0.013	-0.013		0.0139531		M	193	187	187	0.0244172
	F194N-HN	119.662	8.062		F194N-HN	119.602	8.041		-0.06	-0.021		0.0314356		F	194	188	188	0.0669732
	A195N-HN	123.846	8.046		A195N-HN	123.792	8.028		-0.054	-0.018		0.027699		A	195	189	189	0.0256086
	K196N-HN	119.077	8.087		K196N-HN	119.182	8.087		0.105	0		0.0409365		K	196	190	190
	G197N-HN	109.328	8.241		G197N-HN	109.167	8.219		-0.161	-0.022		0.0665131		G	197	191	191	0.0575711
	Q198N-HN	120.286	8.503		Q198N-HN	120.181	8.51		-0.105	0.007		0.0415307		Q	198	192	192	0.0292935
	V200N-HN	120.133	8.121		V200N-HN	120.263	8.141		0.13	0.02		0.0544867		V	200	193	193	0.0139531
	A201N-HN	128.806	8.254		A201N-HN	128.876	8.277		0.07	0.023		0.0356903		A	201	194	194	0.0314356
	Y203N-HN	119.141	7.922		Y203N-HN	119.304	7.948		0.163	0.026		0.0686621		Y	203	195	195	0.027699
	N204N-HN	120.21	8.231		N204N-HN	120.34	8.248		0.13	0.017		0.0534584		N	204	196	196	0.0409365
	T205N-HN	113.918	8.074		T205N-HN	114.011	8.084		0.093	0.01		0.0376118		T	205	197	197	0.0665131
	T206N-HN	115.609	8.101		T206N-HN	115.729	8.105		0.12	0.004		0.0469553		T	206	198	198	0.0415307
	Q207N-HN	121.987	8.163		Q207N-HN	122.15	8.178		0.163	0.015		0.0652954		Q	207	199
	F208N-HN	120.401	8.079		F208N-HN	120.662	8.098		0.261	0.019		0.103515		F	208	200	200	0.0544867
	L209N-HN	123.016	8.088		L209N-HN	123.222	8.081		0.206	-0.007		0.0806181		L	209	201	201	0.0356903
	M210N-HN	120.75	8.23		M210N-HN	120.88	8.236		0.13	0.006		0.0510372		M	210	202
	D211N-HN	121.413	8.264		D211N-HN	121.478	8.271		0.065	0.007		0.0262907		D	211	203	203	0.0686621
	D212N-HN	120.734	8.255		D212N-HN	120.778	8.251		0.044	-0.004		0.0176145		D	212	204	204	0.0534584
	H213N-HN	118.581	8.368		H213N-HN	118.533	8.373		-0.048	0.005		0.0193703		H	213	205	205	0.0376118
	D214N-HN	121.097	8.406		D214N-HN	121.159	8.421		0.062	0.015		0.028448		D	214	206	206	0.0469553
	Q215N-HN	119.819	8.258		Q215N-HN	119.864	8.266		0.045	0.008		0.0192821		Q	215	207	207	0.0652954
	E216N-HN	121.688	8.345		E216N-HN	121.812	8.346		0.124	0.001		0.0483544		E	216	208	208	0.103515
	E217N-HN	122.977	8.394		E217N-HN	123.11	8.408		0.133	0.014		0.0537097		E	217	209	209	0.0806181
	D219N-HN	119.883	8.383		D219N-HN	119.895	8.396		0.012	0.013		0.0138162		D	219	210	210	0.0510372
	L220N-HN	123.16	8.155		L220N-HN	123.169	8.159		0.009	0.004		0.0053209		L	220	211	211	0.0262907
	K221N-HN	120.437	8.332		K221N-HN	120.568	8.335		0.131	0.003		0.0511612		K	221	212	212	0.0176145
	T222N-HN	112.54	7.971		T222N-HN	112.837	7.976		0.297	0.005		0.1159		T	222	213	213	0.0193703
	G223N-HN	110.631	8.304		G223N-HN	110.605	8.316		-0.026	0.012		0.0157083		G	223	214	214	0.028448
	L224N-HN	121.448	7.968		L224N-HN	121.472	7.967		0.024	-0.001		0.00941021		L	224	215	215	0.0192821
	Y225N-HN	119.691	8.173		Y225N-HN	119.734	8.154		0.043	-0.019		0.0253387		Y	225	216	216	0.0483544
	S226N-HN	116.789	8.074		S226N-HN	116.835	8.051		0.046	-0.023		0.0291656		S	226	217	217	0.0537097
	K227N-HN	123.229	8.253		K227N-HN	123.258	8.24		0.029	-0.013		0.0172288		K	227	218
	R228N-HN	121.951	8.222		R228N-HN	122.07	8.229		0.119	0.007		0.0469198		R	228	219	219	0.0138162
	A229N-HN	125.267	8.262		A229N-HN	125.37	8.272		0.103	0.01		0.0413832		A	229	220	220	0.0053209
	A230N-HN	123.16	8.155		A230N-HN	123.282	8.169		0.122	0.014		0.0495819		A	230	221	221	0.0511612
	K232N-HN	120.755	8.256		K232N-HN	120.835	8.271		0.08	0.015		0.0346092		K	232	222	222	0.1159
	S233N-HN	117.08	8.342		S233N-HN	117.308	8.38		0.228	0.038		0.0966725		S	233	223	223	0.0157083
	D234N-HN	122.114	8.362		D234N-HN	122.074	8.37		-0.04	0.008		0.0175271		D	234	224	224	0.00941021
	D235N-HN	120.505	8.264		D235N-HN	120.305	8.257		-0.2	-0.007		0.0782879		D	235	225	225	0.0253387
	T236N-HN	113.887	8.136		T236N-HN	113.943	8.119		0.056	-0.017		0.0276708		T	236	226	226	0.0291656
	S237N-HN	118.228	8.367		S237N-HN	118.281	8.375		0.053	0.008		0.0221578		S	237	227	227	0.0172288
	D238N-HN	122.617	8.401		D238N-HN	122.692	8.404		0.075	0.003		0.0293939		D	238	228	228	0.0469198
	D239N-HN	120.25	8.187		D239N-HN	120.375	8.196		0.125	0.009		0.049558		D	239	229	229	0.0413832
	D240N-HN	120.25	8.187		D240N-HN	120.375	8.196		0.125	0.009		0.049558		D	240	230	230	0.0495819
	F241N-HN	119.762	8.054		F241N-HN	120.32	8.06		0.558	0.006		0.217631		F	241	231
	M242N-HN	121.691	8.119		M242N-HN	122.69	8.082		0.999	-0.037		0.391235		M	242	232	232	0.0346092
	E243N-HN	122.745	8.331		E243N-HN	122.758	8.312		0.013	-0.019		0.0196644		E	243	233	233	0.0966725
	E244N-HN	122.287	8.492		E244N-HN	122.577	8.493		0.29	0.001		0.113067		E	244	234	234	0.0175271
	G245N-HN	110.306	8.51		G245N-HN	110.455	8.52		0.149	0.01		0.0589453		G	245	235	235	0.0782879
	G246N-HN	108.853	8.314		G246N-HN	108.921	8.316		0.068	0.002		0.0265866		G	246	236	236	0.0276708
	E247N-HN	120.514	8.468		E247N-HN	120.547	8.45		0.033	-0.018		0.0221253		E	247	237	237	0.0221578
	E248N-HN	121.671	8.571		E248N-HN	121.938	8.555		0.267	-0.016		0.105318		E	248	238	238	0.0293939
	D249N-HN	121.589	8.365		D249N-HN	121.792	8.395		0.203	0.03		0.084639		D	249	239	239	0.049558
	G250N-HN	109.702	8.382		G250N-HN	109.887	8.398		0.185	0.016		0.0738796		G	250	240	240	0.049558
	G251N-HN	108.92	8.325		G251N-HN	108.983	8.331		0.063	0.006		0.0252841		G	251	241	241	0.217631
	S252N-HN	115.635	8.254		S252N-HN	115.65	8.255		0.015	0.001		0.00593296		S	252	242	242	0.391235
	D253N-HN	127.595	8.078		D253N-HN	127.601	8.066		0.006	-0.012		0.0122259		D	253	243	243	0.0196644
																244	244	0.113067
																245	245	0.0589453
																246	246	0.0265866
																247	247	0.0221253
																248	248	0.105318
																249	249	0.084639
																250	250	0.0738796
																251	251	0.0252841
																252	252	0.00593296
																253	253	0.0122259
																	Average	0.0626628
																	STD	0.073194
																	AVG+STD	0.135857

## Sheet: Fig3AB, S226 Total
15N BR-L-AR-S226C-MTSL 10122023									Q144N-H	1.965	0	8416000	3041000	0.361336						142								Resolved residues only
PRE set		Assignment	3_15N_AA_S226C_noMTSL_10122023/0	12_15N_AA_S226C-MTSL_10172023/2		Raw ratios	Scaled ratios		G251N-H	1.964	0	9140000	3302000	0.361269		Assignment	Scaled ratios		Assignment	143	Assignment	Scaled ratios	Notes/checking	AVG	0.741069				Scaled ratios	Notes/checking
Use the average ratios		Q144N-H	8416000	3041000		0.361336	1.04388		S252N-H	1.735	0	8438000	2665000	0.315833		Q144N-H	1.04388		Q144	144	Q144N-H	1.04388		STD	0.252958		1.044		1.04388
of 144/251/252 for dilution factor		Q145N-H	9683000	3403000		0.351441	1.0153		D253N-H	1.502	0	9293000	2454000	0.26407	Outlier	Q145N-H	1.0153		Q145	145	Q145N-H	1.0153		AVG-STD	0.48811		1.015		1.0153
Fig. 3A,B		R146N-H	11610000	3841000		0.330835	0.955769						AVG	0.346146		R146N-H	0.955769		R146	146	R146N-H	0.955769	overlap with D238	AVG-0.5STD	0.61459		0.956			overlap with D238
		Q147N-H	9209000	3195000		0.346943	1.0023									Q147N-H	1.0023		Q147	147	Q147N-H	1.0023		Remove three outliers 164/186/200			1.002		1.0023
		L148N-H	11010000	3319000		0.301453	0.870885									L148N-H	0.870885		L148	148	L148N-H	0.870885		AVG	0.709663		0.871		0.870885
		G149N-H	6910000	2445000		0.353835	1.02221									G149N-H	1.02221		G149	149	G149N-H	1.02221		STD	0.176131		1.022		1.02221
		K150N-H	8719000	3028000		0.347288	1.0033									K150N-H	1.0033		K150	150	K150N-H	1.0033		AVG-STD	0.533531		1.003		1.0033
		K151N-H	3959000	975100		0.2463	0.711548									K151N-H	0.711548		K151	151	K151N-H	0.711548		AVG-0.5STD	0.621597		0.712		0.711548
		K152N-H	6865000	1590000		0.23161	0.66911									K152N-H	0.66911		K152	152	K152N-H	0.66911					0.669		0.66911
		R154N-H	4900000	1888000		0.385306	1.11313									R154N-H	1.11313		R154	153
		R155N-H	4926000	1249000		0.253553	0.732502									R155N-H	0.732502		R155	154	R154N-H	1.11313	overlap with R155				1.113			overlap with R155
		R156N-H	4062000	890800		0.219301	0.63355									R156N-H	0.63355		R156	155	R155N-H	0.732502	overlap with R154				0.733			overlap with R154
		S158N-H	3803000	786200		0.206732	0.597238									S158N-H	0.597238		S158	156	R156N-H	0.63355					0.634		0.63355
		K159N-H	3666000	1060000		0.289143	0.835322									K159N-H	0.835322		K159	157
		K160N-H	6386000	2262000		0.354212	1.0233									K160N-H	1.0233		K160	158	S158N-H	0.597238					0.597		0.597238
		K161N-H	4085000	868100		0.212509	0.613929									K161N-H	0.613929		K161	159	K159N-H	0.835322					0.835		0.835322
		R162N-H	11620000	3667000		0.315577	0.911687									R162N-H	0.911687		R162	160	K160N-H	1.0233	overlap with R162/E243				1.023			overlap with R162/E243
		W164N-H	2297000	1450000		0.631258	1.82368									W164N-H		Outlier	W164	161	K161N-H	0.613929					0.614		0.613929
		W164NE-HE	5582000	1772000		0.317449	0.917096									W164NE-HE	0.917096		W164NE	162	R162N-H	0.911687	overlap with E243				0.912			overlap with E243
		K165N-H	1502000	331700		0.220839	0.637994									K165N-H	0.637994		K165	163
		Y167N-H	5050000	1415000		0.280198	0.809479									Y167N-H	0.809479		Y167	164	W164N-H		overlap badly with L220/A230							overlap badly with L220/A230
		Y168N-H	1144000	96700		0.084528	0.244197									Y168N-H	0.244197		Y168	165	K165N-H	0.637994					0.638		0.637994
		K169N-H	1426000	217300		0.152384	0.440231									K169N-H	0.440231		K169	166
		L170N-H	1070000	304800		0.28486	0.822947									L170N-H	0.822947		L170	167	Y167N-H	0.809479					0.809		0.809479
		T171N-H	1292000	253400		0.19613	0.566611									T171N-H	0.566611		T171	168	Y168N-H	0.244197					0.244		0.244197
		W172N-H	1891000	366000		0.193548	0.559153									W172N-H	0.559153		W172	169	K169N-H	0.440231					0.44		0.440231
		W172NE-HE	4748000	1612000		0.339511	0.980833									W172NE-HE	0.980833		W172NE	170	L170N-H	0.822947					0.823		0.822947
		E173N-H	2383000	447900		0.187956	0.542997									E173N-H	0.542997		E173	171	T171N-H	0.566611					0.567		0.566611
		E174N-H	1693000	428300		0.252983	0.730856									E174N-H	0.730856		E174	172	W172N-H	0.559153					0.559		0.559153
		K175N-H	1560000	226800		0.145385	0.42001									K175N-H	0.42001		K175	173	E173N-H	0.542997					0.543		0.542997
		K176N-H	2060000	341700		0.165874	0.479202									K176N-H	0.479202		K176	174	E174N-H	0.730856					0.731		0.730856
		K177N-H	2083000	355800		0.170811	0.493466									K177N-H	0.493466		K177	175	K175N-H	0.42001					0.42		0.42001
		F178N-H	3317000	1088000		0.328007	0.947598									F178N-H	0.947598		F178	176	K176N-H	0.479202					0.479		0.479202
		D179N-H	1540000	399100		0.259156	0.74869									D179N-H	0.74869		D179	177	K177N-H	0.493466					0.493		0.493466
		E180N-H	2563000	627100		0.244674	0.706853									E180N-H	0.706853		E180	178	F178N-H	0.947598					0.948		0.947598
		K181N-H	2780000	623200		0.224173	0.647625									K181N-H	0.647625		K181	179	D179N-H	0.74869					0.749		0.74869
		Q182N-H	2815000	816700		0.290124	0.838156									Q182N-H	0.838156		Q182	180	E180N-H	0.706853					0.707		0.706853
		S183N-H	3129000	720900		0.230393	0.665595									S183N-H	0.665595		S183	181	K181N-H	0.647625					0.648		0.647625
		L184N-H	3197000	783500		0.245074	0.708006									L184N-H	0.708006		L184	182	Q182N-H	0.838156					0.838		0.838156
		R185N-H	3547000	886900		0.250042	0.722361									R185N-H	0.722361		R185	183	S183N-H	0.665595					0.666		0.665595
		A186N-H	2070000	1186000		0.572947	1.65522									A186N-H		outlier	A186	184	L184N-H	0.708006					0.708		0.708006
		S187N-H	2849000	948500		0.332924	0.961802									S187N-H	0.961802		S187	185	R185N-H	0.722361					0.722		0.722361
		R188N-H	4166000	1082000		0.259722	0.750324									R188N-H	0.750324		R188	186	A186N-H		overlap with R188 and L209							overlap with R188 and L209
		I189N-H	3949000	984300		0.249253	0.720081									I189N-H	0.720081		I189	187	S187N-H	0.961802	overlap with T205				0.962			overlap with T205
		R190N-H	2950000	452400		0.153356	0.443038									R190N-H	0.443038		R190	188	R188N-H	0.750324					0.75		0.750324
		A191N-H	2950000	452400		0.153356	0.443038									A191N-H	0.443038		A191	189	I189N-H	0.720081					0.72		0.720081
		E192N-H	3006000	536200		0.178377	0.515322									E192N-H	0.515322		E192	190	R190N-H	0.443038	overlap at the same spot with A191				0.443		0.443038	overlap at the same spot with A191
		M193N-H	3072000	500600		0.162956	0.470772									M193N-H	0.470772		M193	191	A191N-H	0.443038					0.443		0.443038
		F194N-H	3308000	579200		0.175091	0.505829									F194N-H	0.505829		F194	192	E192N-H	0.515322					0.515		0.515322
		A195N-H	4289000	915800		0.213523	0.616858									A195N-H	0.616858		A195	193	M193N-H	0.470772					0.471		0.470772
		K196N-H	2983000	397400		0.133222	0.384871									K196N-H	0.384871		K196	194	F194N-H	0.505829					0.506		0.505829
		G197N-H	2760000	555400		0.201232	0.58135									G197N-H	0.58135		G197	195	A195N-H	0.616858					0.617		0.616858
		Q198N-H	8362000	2876000		0.343937	0.993618									Q198N-H	0.993618		Q198	196	K196N-H	0.384871					0.385		0.384871
		V200N-H	2394000	1588000		0.663325	1.91632									V200N-H		outlier	V200	197	G197N-H	0.58135					0.581		0.58135
		A201N-H	3962000	751100		0.189576	0.547676									A201N-H	0.547676		A201	198	Q198N-H	0.993618					0.994		0.993618
		Y203N-H	3801000	767800		0.201999	0.583567									Y203N-H	0.583567		Y203	199
		N204N-H	4721000	1181000		0.250159	0.722698									N204N-H	0.722698		N204	200	V200N-H	1.91632	Not overlapping, not sure what's wrong				1.916
		T205N-H	4803000	1058000		0.220279	0.636376									T205N-H	0.636376		T205	201	A201N-H	0.547676					0.548		0.547676
		T206N-H	3989000	1032000		0.258711	0.747406									T206N-H	0.747406		T206	202
		Q207N-H	3622000	686100		0.189426	0.547242									Q207N-H	0.547242		Q207	203	Y203N-H	0.583567					0.584		0.583567
		F208N-H	5156000	998200		0.1936	0.559301									F208N-H	0.559301		F208	204	N204N-H	0.722698	overlap with D235				0.723		0.722698	overlap with D235
		L209N-H	2871000	606100		0.211111	0.60989									L209N-H	0.60989		L209	205	T205N-H	0.636376					0.636		0.636376
		M210N-H	11360000	3130000		0.275528	0.795988									M210N-H	0.795988		M210	206	T206N-H	0.747406					0.747		0.747406
		D211N-H	5521000	1164000		0.210831	0.609082									D211N-H	0.609082		D211	207	Q207N-H	0.547242					0.547		0.547242
		D212N-H	6008000	1528000		0.254328	0.734741									D212N-H	0.734741		D212	208	F208N-H	0.559301					0.559		0.559301
		H213N-H	5899000	1862000		0.315647	0.911889									H213N-H	0.911889		H213	209	L209N-H	0.60989					0.61		0.60989
		D214N-H	5010000	1148000		0.229142	0.66198									D214N-H	0.66198		D214	210	M210N-H	0.795988					0.796		0.795988
		Q215N-H	4991000	1256000		0.251653	0.727014									Q215N-H	0.727014		Q215	211	D211N-H	0.609082					0.609		0.609082
		E216N-H	5162000	1072000		0.207671	0.599953									E216N-H	0.599953		E216	212	D212N-H	0.734741	overlap with K232				0.735			overlap with K232
		E217N-H	5492000	1614000		0.293882	0.849012									E217N-H	0.849012		E217	213	H213N-H	0.911889					0.912		0.911889
		D219N-H	4690000	1038000		0.221322	0.639389									D219N-H	0.639389		D219	214	D214N-H	0.66198					0.662		0.66198
		L220N-H	13950000	3322000		0.238136	0.687965									L220N-H	0.687965		L220	215	Q215N-H	0.727014					0.727		0.727014
		K221N-H	4687000	1016000		0.21677	0.626238									K221N-H	0.626238		K221	216	E216N-H	0.599953					0.6		0.599953
		T222N-H	3968000	735600		0.185383	0.535563									T222N-H	0.535563		T222	217	E217N-H	0.849012					0.849		0.849012
		G223N-H	3977000	1047000		0.263264	0.760557									G223N-H	0.760557		G223	218
		L224N-H	4631000	1046000		0.225869	0.652526									L224N-H	0.652526		L224	219	D219N-H	0.639389					0.639		0.639389
		Y225N-H	4723000	1477000		0.312725	0.903448									Y225N-H	0.903448		Y225	220	L220N-H	0.687965	overlap with A230				0.688			overlap with A230
		C226?N-H	1248000	282700		0.226522	0.654413									C226?N-H	0.654413		C226?	221	K221N-H	0.626238					0.626		0.626238
		K227N-H	3055000	802900		0.262815	0.759261									K227N-H	0.759261		K227	222	T222N-H	0.535563					0.536		0.535563
		R228N-H	4749000	1066000		0.224468	0.648479									R228N-H	0.648479		R228	223	G223N-H	0.760557					0.761		0.760557
		A229N-H	5524000	1280000		0.231716	0.669417									A229N-H	0.669417		A229	224	L224N-H	0.652526					0.653		0.652526
		A230N-H	13950000	3322000		0.238136	0.687965									A230N-H	0.687965		A230	225	Y225N-H	0.903448					0.903		0.903448
		K232N-H	6008000	1528000		0.254328	0.734741									K232N-H	0.734741		K232	226	C226?N-H	0.654413					0.654		0.654413
		S233N-H	5380000	717900		0.133439	0.385498									S233N-H	0.385498		S233	227	K227N-H	0.759261					0.759		0.759261
		D234N-H	6504000	2043000		0.314114	0.907462									D234N-H	0.907462		D234	228	R228N-H	0.648479					0.648		0.648479
		D235N-H	7838000	2025000		0.258357	0.746381									D235N-H	0.746381		D235	229	A229N-H	0.669417					0.669		0.669417
		T236N-H	6278000	1584000		0.25231	0.728911									T236N-H	0.728911		T236	230	A230N-H	0.687965	overlap with L220				0.688			overlap with L220
		S237N-H	6327000	1575000		0.248933	0.719157									S237N-H	0.719157		S237	231
		D238N-H	8082000	2889000		0.357461	1.03269									D238N-H	1.03269		D238	232	K232N-H	0.734741	overlap with D212				0.735			overlap with D212
		D239N-H	9356000	2119000		0.226486	0.654307									D239N-H	0.654307		D239	233	S233N-H	0.385498					0.385		0.385498
		D240N-H	9356000	2119000		0.226486	0.654307									D240N-H	0.654307		D240	234	D234N-H	0.907462					0.907		0.907462
		F241N-H	4774000	1050000		0.219941	0.635401									F241N-H	0.635401		F241	235	D235N-H	0.746381	overlap with N204				0.746		0.746381	overlap with N204
		M242N-H	3958000	1028000		0.259727	0.75034									M242N-H	0.75034		M242	236	T236N-H	0.728911					0.729		0.728911
		E243N-H	11620000	3667000		0.315577	0.911687									E243N-H	0.911687		E243	237	S237N-H	0.719157					0.719		0.719157
		E244N-H	5276000	1079000		0.204511	0.590823									E244N-H	0.590823		E244	238	D238N-H	1.03269	overlap with R146				1.033			overlap with R146
		G245N-H	5040000	1031000		0.204563	0.590975									G245N-H	0.590975		G245	239	D239N-H	0.654307	overlap with D340				0.654			overlap with D340
		G246N-H	6673000	1217000		0.182377	0.526878									G246N-H	0.526878		G246	240	D240N-H	0.654307	overlap with D239				0.654			overlap with D239
		E247N-H	7462000	1989000		0.266551	0.770052									E247N-H	0.770052		E247	241	F241N-H	0.635401					0.635		0.635401
		E248N-H	6584000	1432000		0.217497	0.628339									E248N-H	0.628339		E248	242	M242N-H	0.75034					0.75		0.75034
		D249N-H	7087000	1352000		0.190772	0.551131									D249N-H	0.551131		D249	243	E243N-H	0.911687	overlap with R162/E243				0.912			overlap with R162/E243
		G250N-H	6344000	1311000		0.206652	0.597008									G250N-H	0.597008		G250	244	E244N-H	0.590823					0.591		0.590823
		G251N-H	9140000	3302000		0.361269	1.04369									G251N-H	1.04369		G251	245	G245N-H	0.590975					0.591		0.590975
		S252N-H	8438000	2665000		0.315833	0.912428									S252N-H	0.912428		S252	246	G246N-H	0.526878	overlap with G251 a bit				0.527			overlap with G251 a bit
		D253N-H	9293000	2454000		0.26407	0.762886									D253N-H	0.762886		D253	247	E247N-H	0.770052					0.77		0.770052
						AVG	0.741069													248	E248N-H	0.628339					0.628		0.628339
			Noise estimation with nmrPipe	STDEV	MAX intensity	STD	0.252958									AVG	0.709663			249	D249N-H	0.551131					0.551		0.551131
				95497.4	389923	AVG-STD	0.48811									STD	0.176131			250	G250N-H	0.597008					0.597		0.597008
				97217.3	396594	AVG-0.5STD	0.61459									AVG-STD	0.533531			251	G251N-H	1.04369					1.044		1.04369
				117913	505276											AVG-0.5STD	0.621597			252	S252N-H	0.912428					0.912		0.912428
			AVG	103543	430598															253	D253N-H	0.762886					0.763		0.762886
			Noise ratio lower limit	0.0354503	0.147426																W164NE-HE	0.917096					0.917		0.917096
			3X(noise ratio)	0.106351	0.442277																W172NE-HE	0.980833					0.981		0.980833
																												AVG	0.690145
																												STD	0.16998
																												AVG-STD	0.520165
																												AVG-0.5STD	0.605155

## Sheet: FigS11, S237 Total
15N BR-L-AR-S237C-MTSL 09292020			15N BR-L-AR-S237C						15N BR-L-AR_S237C-MTSL								Q144N-H	1150956	66670940160	57926.6					142								Resolved residues only
PRE set			Assignment	w1	w2	Data_Height	S/N		Assignment	w1	w2	Data Height	S/N	Ratio	Scaled_ratio		Q145N-HN	1228508	82755657728	67362.7		Assignment	Scaled_ratio		143	Assignment	Scaled ratios	Notes/checking	AVG	0.57175				Scaled ratios	Notes/checking
Use the average ratios																	D239N-HN	1248633	72234278912	57850.7					144	Q144N-HN	1.02009		STD	0.204117		1.02009		1.02009
of 144/145/239/253 for dilution factor			Q144N-HN	121.676	8.534	1150956	51		Q144N-HN	121.731	8.535	66670940160	24	57926.6	1.02009		D253N-H	2164854	95262212096	44004		Q144N-HN	1.02009		145	Q145N-HN	1.18626	overlap with Q147	AVG-STD	0.367633		1.18626
Supplementary Fig. 11			Q145N-HN	121.796	8.46	1228508	54		Q145N-HN	121.783	8.462	82755657728	29	67362.7	1.18626				AVG	56786		Q145N-HN	1.18626		146	R146N-HN	0.698045	overlap with D238	AVG-0.5STD	0.469691		0.698045			overlap with D238
			R146N-HN	122.394	8.382	1512144	67		R146N-HN	122.445	8.384	59940139008	21	39639.2	0.698045							R146N-HN	0.698045		147	Q147N-HN	0.920319	overlap with Q145	Resolved only			0.920319
			Q147N-HN	121.604	8.464	1355576	60		Q147N-HN	121.642	8.464	70844080128	25	52261.2	0.920319							Q147N-HN	0.920319		148	L148N-HN	0.643075		AVG	0.538419		0.643075		0.643075
			L148N-HN	123.867	8.322	1597515	70		L148N-HN	123.91	8.324	58337468416	21	36517.6	0.643075							L148N-HN	0.643075		149	G149N-HN	0.683306		STD	0.167889		0.683306		0.683306
			G149N-HN	109.57	8.418	1198504	53		G149N-HN	109.614	8.417	46504640512	16	38802.2	0.683306							G149N-HN	0.683306		150	K150N-HN	0.544085		AVG-STD	0.37053		0.544085		0.544085
			K150N-HN	120.91	8.147	1329943	59		K150N-HN	120.939	8.145	41090437120	15	30896.4	0.544085							K150N-HN	0.544085		151	K151N-HN	0.552223	overlap with E247	AVG-0.5STD	0.454474		0.552223			overlap with E247
			K151N-HN	120.464	8.474	1831678	81		K151N-HN	120.492	8.475	57438715904	20	31358.5	0.552223							K151N-HN	0.552223		152	K152N-HN	0.572876					0.572876		0.572876
			K152N-HN	122.3	8.351	1668654	74		K152N-HN	122.315	8.353	54283563008	19	32531.3	0.572876							K152N-HN	0.572876		153
			R154N-HN	123.324	8.527	587217	26		R154N-HN	123.417	8.532	31186012160	11	53108.2	0.935233							R154N-HN	0.935233		154	R154N-HN	0.935233	overlap with R155				0.935233			overlap with R155
			R155N-HN	123.238	8.545	831499	37		R155N-HN	123.363	8.547	34001815552	12	40892.2	0.72011							R155N-HN	0.72011		155	R155N-HN	0.72011	overlap with R154				0.72011			overlap with R154
			R156N-H	124.085	8.514	925956	41		R156N-H	124.167	8.518	31175450624	11	33668.4	0.5929							R156N-H	0.5929		156	R156N-H	0.5929					0.5929		0.5929
			S158N-HN	116.619	8.456	725096	32		S158N-HN	116.696	8.457	26834442240	9	37008.1	0.651712							S158N-HN	0.651712		157
			K159N-HN	123.621	8.463	658350	29		K159N-HN	123.639	8.469	18241404928	6	27707.8	0.487933							K159N-HN	0.487933		158	S158N-HN	0.651712					0.651712		0.651712
			K160N-HN	122.894	8.297	822345	36		K160N-HN	122.969	8.294	17409544192	6	21170.6	0.372814							K160N-HN	0.372814		159	K159N-HN	0.487933					0.487933		0.487933
			K161N-HN	122.17	8.28	871259	38		K161N-HN	122.224	8.277	22279983104	8	25572.2	0.450325							K161N-HN	0.450325		160	K160N-HN	0.372814	resolved				0.372814		0.372814	resolved
			R162N-HN	122.731	8.341	1882693	83		R162N-HN	122.791	8.341	53516173312	19	28425.3	0.500569							R162N-HN	0.500569	Outlier	161	K161N-HN	0.450325					0.450325		0.450325
			W164N-HN	123.181	8.232	740942	33		W164N-HN	123.283	8.237	20382232576	7	27508.5	0.484425							W164N-HN	0.484425		162	R162N-HN	0.500569	overlap with E243				0.500569			overlap with E243
			W164NE-HE	129.449	10.16	1581076	70		W164NE-HE	129.49	10.157	10981689344	4	6945.71	0.122314							W164NE-HE	0.122314		163
			K165N-HN	124.678	7.867	560258	25		K165N-HN	124.707	7.868	-1328802048	0	-2371.77	-0.0417668							K165N-HN	-0.0417668		164	W164N-HN	0.484425	resolved				0.484425		0.484425	resolved
			Y167N-HN	120.273	8.07	612379	27		Y167N-HN	120.273	8.07	15671817216	6	25591.7	0.450669							Y167N-HN	0.450669		165	K165N-HN	-0.0417668					-0.0417668		-0.0417668
			Y168N-HN	115.804	7.612	415809	18		Y168N-HN	115.714	7.592	10273411072	4	24707	0.43509							Y168N-HN	0.43509		166
			K169N-HN	120.872	7.663	516203	23		K169N-HN	120.907	7.649	16154499072	6	31294.9	0.551102							K169N-HN	0.551102		167	Y167N-HN	0.450669					0.450669		0.450669
			L170N-HN	121.919	7.551	391388	17		L170N-HN	121.92	7.535	9279799296	3	23710	0.417532							L170N-HN	0.417532		168	Y168N-HN	0.43509					0.43509		0.43509
			T171N-HN	113.704	8.597	410990	18		T171N-HN	113.718	8.601	9673916416	3	23538.1	0.414505							T171N-HN	0.414505		169	K169N-HN	0.551102					0.551102		0.551102
			W172N-HN	121.929	8.697	490495	22		W172N-HN	121.971	8.704	15049844736	5	30683	0.540326							W172N-HN	0.540326		170	L170N-HN	0.417532					0.417532		0.417532
			W172NE-HE	129.781	10.154	1246817	55		W172NE-HE	129.781	10.154	111539000	0	89.459	0.00157537							W172NE-HE	0.00157537		171	T171N-HN	0.414505					0.414505		0.414505
			E173N-HN	119.055	8.439	707324	31		E173N-HN	119.05	8.446	14831756288	5	20968.8	0.369261							E173N-HN	0.369261		172	W172N-HN	0.540326					0.540326		0.540326
			E174N-HN	120.015	7.712	553300	24		E174N-HN	120.066	7.707	16664589312	6	30118.5	0.530387							E174N-HN	0.530387		173	E173N-HN	0.369261					0.369261		0.369261
			K175N-HN	122.033	8.625	525202	23		K175N-HN	122.033	8.625	7753559552	3	14763	0.259976							K175N-HN	0.259976		174	E174N-HN	0.530387					0.530387		0.530387
			K176N-HN	119.135	7.796	637839	28		K176N-HN	119.121	7.763	22886148096	8	35880.8	0.631859							K176N-HN	0.631859		175	K175N-HN	0.259976					0.259976		0.259976
			K177N-HN	118.834	7.59	606158	27		K177N-HN	118.837	7.579	14426018816	5	23799.1	0.419102							K177N-HN	0.419102		176	K176N-HN	0.631859					0.631859		0.631859
			F178N-HN	121.483	8.204	778868	34		F178N-HN	121.535	8.204	27356196864	10	35123	0.618516							F178N-HN	0.618516		177	K177N-HN	0.419102					0.419102		0.419102
			D179N-HN	121.198	8.707	495848	22		D179N-HN	121.201	8.725	14667022336	5	29579.7	0.520897							D179N-HN	0.520897		178	F178N-HN	0.618516					0.618516		0.618516
			E180N-HN	121.3	8.184	837921	37		E180N-HN	121.335	8.177	24495331328	9	29233.5	0.514801							E180N-HN	0.514801		179	D179N-HN	0.520897					0.520897		0.520897
			K181N-HN	120.06	7.995	850796	38		K181N-HN	120.13	7.982	19696062464	7	23150.2	0.407674							K181N-HN	0.407674		180	E180N-HN	0.514801					0.514801		0.514801
			Q182N-HN	119.264	8.185	812515	36		Q182N-HN	119.284	8.175	24799744000	9	30522.2	0.537495							Q182N-HN	0.537495		181	K181N-HN	0.407674					0.407674		0.407674
			S183N-HN	115.935	8.154	734987	32		S183N-HN	116.013	8.151	18694330368	7	25434.9	0.447908							S183N-HN	0.447908		182	Q182N-HN	0.537495					0.537495		0.537495
			L184N-HN	123.454	8.016	734882	32		L184N-HN	123.471	8.007	21508136960	8	29267.5	0.515399							L184N-HN	0.515399		183	S183N-HN	0.447908					0.447908		0.447908
			R185N-HN	120.39	8.01	1748156	77		R185N-HN	120.435	8.012	51479441408	18	29447.9	0.518576							R185N-HN	0.518576	outlier	184	L184N-HN	0.515399					0.515399		0.515399
			A186N-HN	122.943	8.091	1606372	71		A186N-HN	122.925	8.085	37180252160	13	23145.5	0.407591							A186N-HN	0.407591		185	R185N-HN	0.518576					0.518576		0.518576
			S187N-HN	113.998	8.11	883628	39		S187N-HN	114.048	8.109	28111978496	10	31814.3	0.560248							S187N-HN	0.560248		186	A186N-HN	0.407591	overlap with L209				0.407591			overlap with L209
			R188N-HN	123.173	8.086	767176	34		R188N-HN	123.249	8.076	25990543360	9	33878.2	0.596594							R188N-HN	0.596594		187	S187N-HN	0.560248	resolved				0.560248		0.560248	resolved
			I189N-HN	120.589	8.018	960546	42		I189N-HN	120.556	8.016	43528130560	15	45316	0.798014							I189N-HN	0.798014		188	R188N-HN	0.596594					0.596594		0.596594
			R190N-HN	122.39	8.11	759891	34		R190N-HN	122.382	8.104	26152263680	9	34415.8	0.606062							R190N-HN	0.606062		189	I189N-HN	0.798014					0.798014		0.798014
			A191N-HN	122.203	8.149	788148	35		A191N-HN	122.2	8.145	27884744704	10	35380.1	0.623042							A191N-HN	0.623042		190	R190N-HN	0.606062	resolved				0.606062		0.606062	resolved
			E192N-HN	119.042	8.284	913521	40		E192N-HN	119.122	8.272	22152622080	8	24249.7	0.427037							E192N-HN	0.427037		191	A191N-HN	0.623042					0.623042		0.623042
			M193N-HN	119.181	8.12	774305	34		M193N-HN	119.246	8.121	30924492800	11	39938.4	0.703314							M193N-HN	0.703314		192	E192N-HN	0.427037					0.427037		0.427037
			F194N-HN	119.619	8.074	941483	42		F194N-HN	119.668	8.077	22137632768	8	23513.6	0.414074							F194N-HN	0.414074		193	M193N-HN	0.703314					0.703314		0.703314
			A195N-HN	123.761	8.05	939463	41		A195N-HN	123.752	8.046	27833569280	10	29627.1	0.521733							A195N-HN	0.521733		194	F194N-HN	0.414074					0.414074		0.414074
			K196N-HN	118.983	8.087	848896	37		K196N-HN	118.944	8.075	18084282368	6	21303.3	0.375151							K196N-HN	0.375151		195	A195N-HN	0.521733					0.521733		0.521733
			G197N-HN	109.286	8.243	685239	30		G197N-HN	109.307	8.237	22543216640	8	32898.3	0.579339							G197N-HN	0.579339		196	K196N-HN	0.375151					0.375151		0.375151
			Q198N-HN	120.24	8.511	922188	41		Q198N-HN	120.273	8.513	64287961088	23	69712.4	1.22763							Q198N-HN	1.22763	outlier	197	G197N-HN	0.579339					0.579339		0.579339
			V200N-HN	120.116	8.132	1166261	51		V200N-HN	120.181	8.138	30178215936	11	25876	0.455676							V200N-HN	0.455676		198	Q198N-HN	1.22763	Not sure what is wrong				1.22763
			A201N-HN	128.809	8.264	1062312	47		A201N-HN	128.903	8.269	18397796352	6	17318.6	0.304981							A201N-HN	0.304981		199
			Y203N-HN	119.141	7.937	973501	43		Y203N-HN	119.268	7.948	19602345984	7	20135.9	0.354593							Y203N-HN	0.354593		200	V200N-HN	0.455676					0.455676		0.455676
			N204N-HN	120.171	8.244	742062	33		N204N-HN	120.215	8.237	53419122688	19	71987.4	1.2677							N204N-HN	1.2677		201	A201N-HN	0.304981					0.304981		0.304981
			T205N-HN	113.877	8.082	696756	31		T205N-HN	113.924	8.082	30081175552	11	43173.2	0.760279							T205N-HN	0.760279		202
			T206N-HN	115.576	8.107	862047	38		T206N-HN	115.63	8.107	30403440640	11	35268.9	0.621084							T206N-HN	0.621084		203	Y203N-HN	0.354593					0.354593		0.354593
			Q207N-HN	121.959	8.167	894392	39		Q207N-HN	121.998	8.166	33778057216	12	37766.5	0.665067							Q207N-HN	0.665067		204	N204N-HN	1.2677	overlap with D239				1.2677			overlap with D239
			F208N-HN	120.397	8.085	1273060	56		F208N-HN	120.435	8.089	32835872768	12	25792.9	0.454212							F208N-HN	0.454212		205	T205N-HN	0.760279					0.760279		0.760279
			L209N-HN	122.943	8.091	1606372	71		L209N-HN	122.925	8.085	37180252160	13	23145.5	0.407591							L209N-HN	0.407591		206	T206N-HN	0.621084					0.621084		0.621084
			M210N-HN	120.732	8.245	2242866	99		M210N-HN	120.746	8.246	60822409216	21	27118.2	0.47755							M210N-HN	0.47755		207	Q207N-HN	0.665067					0.665067		0.665067
			D211N-HN	121.377	8.271	1389681	61		D211N-HN	121.413	8.268	47400361984	17	34108.8	0.600655							D211N-HN	0.600655		208	F208N-HN	0.454212					0.454212		0.454212
			D212N-HN	120.696	8.266	2153892	95		D212N-HN	120.751	8.256	63113519104	22	29302.1	0.516009							D212N-HN	0.516009		209	L209N-HN	0.407591					0.407591		0.407591
			H213N-HN	118.563	8.371	1189412	52		H213N-HN	118.534	8.382	48896819200	17	41110.1	0.723947							H213N-HN	0.723947		210	M210N-HN	0.47755	overlap with D212 and K232				0.47755			overlap with D212 and K232
			D214N-HN	121.047	8.409	1186205	52		D214N-HN	121.068	8.414	47068098560	17	39679.6	0.698756							D214N-HN	0.698756		211	D211N-HN	0.600655					0.600655		0.600655
			Q215N-HN	119.784	8.263	1375353	61		Q215N-HN	119.812	8.264	50062114816	18	36399.5	0.640994							Q215N-HN	0.640994		212	D212N-HN	0.516009	overlap with K232 and M210				0.516009			overlap with K232 and M210
			E216N-HN	121.662	8.348	1449312	64		E216N-HN	121.679	8.345	48279752704	17	33312.2	0.586627							E216N-HN	0.586627		213	H213N-HN	0.723947					0.723947		0.723947
			E217N-HN	122.953	8.401	1552031	68		E217N-HN	122.965	8.404	45972226048	16	29620.7	0.52162							E217N-HN	0.52162		214	D214N-HN	0.698756					0.698756		0.698756
			D219N-HN	119.852	8.387	1328760	59		D219N-HN	119.942	8.389	43909074944	15	33045.2	0.581924							D219N-HN	0.581924		215	Q215N-HN	0.640994					0.640994		0.640994
			L220N-HN	123.137	8.163	3470554	153		L220N-HN	123.18	8.166	100156342272	35	28858.9	0.508204							L220N-HN	0.508204		216	E216N-HN	0.586627					0.586627		0.586627
			K221N-HN	120.358	8.34	1185915	52		K221N-HN	120.399	8.342	30674579456	11	25865.7	0.455495							K221N-HN	0.455495		217	E217N-HN	0.52162					0.52162		0.52162
			T222N-HN	112.437	7.976	1085456	48		T222N-HN	112.466	7.976	48359112704	17	44551.9	0.784558							T222N-HN	0.784558		218
			G223N-HN	110.595	8.309	962720	42		G223N-HN	110.646	8.309	32294201344	11	33544.7	0.590722							G223N-HN	0.590722		219	D219N-HN	0.581924					0.581924		0.581924
			L224N-HN	121.392	7.972	1112193	49		L224N-HN	121.414	7.969	38593257472	14	34700.1	0.611069							L224N-HN	0.611069		220	L220N-HN	0.508204	overlap with A230				0.508204			overlap with A230
			Y225N-HN	119.667	8.184	1240654	55		Y225N-HN	119.722	8.192	36460269568	13	29387.9	0.517521							Y225N-HN	0.517521		221	K221N-HN	0.455495					0.455495		0.455495
			S226N-HN	116.763	8.085	803176	35		S226N-HN	116.827	8.084	36947988480	13	46002.4	0.8101							S226N-HN	0.8101		222	T222N-HN	0.784558					0.784558		0.784558
			K227N-HN	123.191	8.261	1041056	46		K227N-HN	123.254	8.263	28042176512	10	26936.3	0.474347							K227N-HN	0.474347		223	G223N-HN	0.590722					0.590722		0.590722
			R228N-HN	121.926	8.229	1262270	56		R228N-HN	121.977	8.229	49823551488	18	39471.4	0.69509							R228N-HN	0.69509		224	L224N-HN	0.611069					0.611069		0.611069
			A229N-HN	125.228	8.27	1216223	54		A229N-HN	125.291	8.273	44844056576	16	36871.6	0.649308							A229N-HN	0.649308		225	Y225N-HN	0.517521					0.517521		0.517521
			A230N-HN	123.137	8.163	3470554	153		A230N-HN	123.18	8.166	100156342272	35	28858.9	0.508204							A230N-HN	0.508204		226	S226N-HN	0.8101					0.8101		0.8101
			K232N-HN	120.696	8.264	2540806	112		K232N-HN	120.751	8.256	63113519104	22	24840	0.437431							K232N-HN	0.437431		227	K227N-HN	0.474347					0.474347		0.474347
			S233N-HN	117.049	8.348	946274	42		S233N-HN	117.072	8.348	32962172928	12	34833.6	0.61342							S233N-HN	0.61342		228	R228N-HN	0.69509					0.69509		0.69509
			D234N-HN	122.094	8.358	1286170	57		D234N-HN	122.214	8.358	61439582208	22	47769.4	0.841218							D234N-HN	0.841218		229	A229N-HN	0.649308					0.649308		0.649308
			D235N-HN	120.457	8.276	1622671	72		D235N-HN	120.557	8.273	45410992128	16	27985.3	0.492821							D235N-HN	0.492821		230	A230N-HN	0.508204	overlap with L220				0.508204			overlap with L220
			T236N-HN	113.598	8.131	1284634	57		T236N-HN	113.649	8.127	27269937152	10	21227.8	0.373821							T236N-HN	0.373821		231
			C237?N-H	121.199	8.373	1062519	47		C237?N-HN	121.238	8.371	27377537024	17	25766.6	0.45375							S237N-HN	0.45375		232	K232N-HN	0.437431	overlap with D212				0.437431			overlap with D212
			D238N-HN	123.344	8.446	1148391	51		D238N-HN	123.399	8.445	32454035456	11	28260.4	0.497666							D238N-HN	0.497666		233	S233N-HN	0.61342					0.61342		0.61342
			D239N-HN	120.098	8.218	1248633	55		D239N-HN	120.126	8.215	72234278912	25	57850.7	1.01875							D239N-HN	1.01875		234	D234N-HN	0.841218					0.841218		0.841218
			D240N-HN	120.436	8.199	1257729	55		D240N-HN	120.492	8.196	31142346752	11	24760.8	0.436037							D240N-HN	0.436037		235	D235N-HN	0.492821	resolved				0.492821		0.492821	resolved
			F241N-HN	119.689	8.05	1176754	52		F241N-HN	119.746	8.049	28724260864	10	24409.7	0.429855							F241N-HN	0.429855		236	T236N-HN	0.373821					0.373821		0.373821
			M242N-HN	121.566	8.114	982376	43		M242N-HN	121.576	8.112	30579531776	11	31128.1	0.548166							M242N-HN	0.548166		237	S237N-HN	0.45375					0.45375		0.45375
			E243N-HN	122.731	8.341	1882693	83		E243N-HN	122.791	8.341	53516173312	19	28425.3	0.500569							E243N-HN	0.500569		238	D238N-HN	0.497666	overlap with R146				0.497666			overlap with R146
			E244N-HN	122.259	8.501	1367672	60		E244N-HN	122.291	8.502	32335181824	11	23642.5	0.416344							E244N-HN	0.416344		239	D239N-HN	1.01875	overlap with N204				1.01875			overlap with N204
			G245N-HN	110.286	8.519	1234726	54		G245N-HN	110.336	8.519	38338338816	14	31050.1	0.546791							G245N-HN	0.546791		240	D240N-HN	0.436037	resolved				0.436037		0.436037	resolved
			G246N-HN	108.778	8.317	1493096	66		G246N-HN	108.838	8.315	53355962368	19	35735.1	0.629295							G246N-HN	0.629295		241	F241N-HN	0.429855					0.429855		0.429855
			E247N-HN	120.464	8.474	1831678	81		E247N-HN	120.492	8.475	57438715904	20	31358.5	0.552223							E247N-HN	0.552223		242	M242N-HN	0.548166					0.548166		0.548166
			E248N-HN	121.644	8.578	1750361	77		E248N-HN	121.666	8.577	55725678592	20	31836.7	0.560643							E248N-HN	0.560643		243	E243N-HN	0.500569	overlap with R162/E243				0.500569			overlap with R162/E243
			D249N-HN	121.549	8.371	1832680	81		D249N-HN	121.587	8.374	62746611712	22	34237.6	0.602924							D249N-HN	0.602924		244	E244N-HN	0.416344					0.416344		0.416344
			G250N-HN	109.701	8.388	1606437	71		G250N-HN	109.715	8.389	57621360640	20	35869	0.631653							G250N-HN	0.631653		245	G245N-HN	0.546791					0.546791		0.546791
			G251N-HN	108.925	8.333	1691047	75		G251N-HN	108.941	8.329	68336295936	24	40410.6	0.71163							G251N-HN	0.71163		246	G246N-HN	0.629295	overlap with G251 a bit				0.629295			overlap with G251 a bit
			S252N-HN	115.598	8.26	1707599	75		S252N-HN	115.63	8.261	72939405312	26	42714.6	0.752203							S252N-HN	0.752203		247	E247N-HN	0.552223	overlap with K151				0.552223			overlap with K151
			D253N-HN	127.57	8.083	2164854	95		D253N-HN	127.57	8.083	95262212096	34	44004	0.774909							D253N-HN	0.774909		248	E248N-HN	0.560643					0.560643		0.560643
														AVG	0.56832							AVG	0.57175		249	D249N-HN	0.602924					0.602924		0.602924
														STD	0.203062							STD	0.204117		250	G250N-HN	0.631653					0.631653		0.631653
														AVG-STD	0.365259							AVG-STD	0.367633		251	G251N-HN	0.71163	overlap with G246 a bit				0.71163			overlap with G246 a bit
														AVG-0.5STD	0.46679							AVG-0.5STD	0.469691		252	S252N-HN	0.752203					0.752203		0.752203
																									253	D253N-HN	0.774909					0.774909		0.774909
																										W164NE-HE	0.122314					0.122314		0.122314
																										W172NE-HE	0.00157537					0.00157537		0.00157537
																																	AVG	0.534122
																																	STD	0.165388
																																	AVG-STD	0.368733
																																	AVG-0.5STD	0.451428

## Sheet: Fig3CDE, Inter PRE
S237, S226, S233 mixed labeling experiments											S237C	S226C	S233C		142		S237C	S226C	S233C					Resolved residues only	142		S237C	S226C	S233C
PRE set	Assignment	3_fHSQC_AA_142-253_15N_70uM_600MHz_20200912/3	12_fHSQC_15N-AA_U-S237C-MTSL_35uMeach_600MHz_20200913/12	22_fHSQC_AA_142-253_15N_50uM_600MHz_20200914/22	32_fHSQC_15N-AA_U-S226C-MTSL_25uMeach_600MHz_20200915/32	42_fHSQC_15N-AA_U-S233C-MTSL_25uMeach_600MHz_20200915/42		ratio_12	ratio_32	ratio_42	Scaled_ratio_12	Scaled_ratio_32	Scaled_Ratio_42		143	Assignment	Scaled_ratio_12	Scaled_ratio_32	Scaled_Ratio_42		Notes/checking				143	Assignment	Scaled_ratio_12	Scaled_ratio_32	Scaled_Ratio_42		Notes/checking
Inter only	Q144N-HN	6176000	3235000	2617000	3797000	3434000		0.523802	1.4509	1.31219	0.368673	1.10521	0		144	Q144N-HN	0.96863	1.0212	0.999552						144	Q144N-HN	0.96863	1.0212	0.999552
Fig. 3C,D,E	Q145N-HN	8000000	4021000	3036000	4407000	3960000		0.502625	1.45158	1.30435	0.353768	1.10573	0		145	Q145N-HN	0.929469	1.02168	0.993579						145	Q145N-HN	0.929469	1.02168	0.993579
	R146N-HN	8235000	4447000	3490000	5041000	4638000		0.540012	1.44441	1.32894	0.380082	1.10027	0		146	R146N-HN	0.998606	1.01664	1.01231		overlap with D238				146	R146N-HN					overlap with D238
	Q147N-HN	8689000	3836000	3095000	4710000	4030000		0.441478	1.52181	1.3021	0.31073	1.15923	0		147	Q147N-HN	0.816394	1.07111	0.991866						147	Q147N-HN	0.816394	1.07111	0.991866
	L148N-HN	7352000	3991000	3134000	4698000	4170000		0.542845	1.49904	1.33057	0.382077	1.14189	0		148	L148N-HN	1.00385	1.05509	1.01355						148	L148N-HN	1.00385	1.05509	1.01355
	G149N-HN	6122000	3189000	2641000	3661000	3290000		0.520908	1.38622	1.24574	0.366636	1.05594	0		149	G149N-HN	0.963279	0.975676	0.948935						149	G149N-HN	0.963279	0.975676	0.948935
	K150N-HN	6910000	3668000	2828000	4238000	3667000		0.530825	1.49859	1.29668	0.373616	1.14154	0		150	K150N-HN	0.981617	1.05476	0.987735						150	K150N-HN	0.981617	1.05476	0.987735
	K151N-HN	8952000	4469000	3691000	5354000	4808000		0.499218	1.45056	1.30263	0.35137	1.10495	0		151	K151N-HN	0.923169	1.02096	0.992268						151	K151N-HN	0.923169	1.02096	0.992268
	K152N-HN	10640000	4722000	3976000	5351000	4759000		0.443797	1.34582	1.19693	0.312362	1.02517	0		152	K152N-HN	0.820682	0.947246	0.911755						152	K152N-HN	0.820682	0.947246	0.911755
	R154N-HN	4399000	1831000	1449000	2214000	1897000		0.416231	1.52795	1.30918	0.29296	1.16391	0		153										153						Keep the following to emphasize the difference, but remember to specify
	R155N-HN	4645000	1720000	1689000	2254000	1964000		0.370291	1.33452	1.16282	0.260625	1.01656	0		154	R154N-HN	0.769707	1.07543	0.997258		overlap with R155				154	R154N-HN	0.769707	1.07543	0.997258		overlap with R155
	R156N-HN	4674000	1769000	1950000	2521000	2303000		0.378477	1.29282	1.18103	0.266387	0.984798	0		155	R155N-HN	0.684752	0.939287	0.885769		overlap with R154				155	R155N-HN	0.684752	0.939287	0.885769		overlap with R154
	S158N-HN	4045000	1556000	1485000	2044000	1597000		0.384672	1.37643	1.07542	0.270748	1.04849	0		156	R156N-HN	0.69989	0.909939	0.899639						156	R156N-HN	0.69989	0.909939	0.899639
	K159N-HN	3541000	1617000	1543000	2331000	1824000		0.456651	1.51069	1.18211	0.321409	1.15076	0		157										157
	K160N-HN	4722000	1930000	1876000	2416000	2053000		0.408725	1.28785	1.09435	0.287677	0.981009	0		158	S158N-HN	0.711348	0.968788	0.819195						158	S158N-HN	0.711348	0.968788	0.819195
	K161N-HN	5174000	2287000	2108000	2981000	2475000		0.442018	1.41414	1.1741	0.31111	1.07721	0		159	K159N-HN	0.844452	1.06329	0.900467						159	K159N-HN	0.844452	1.06329	0.900467
	R162N-HN	11650000	5846000	4859000	7071000	6164000		0.501803	1.45524	1.26857	0.353189	1.10852	0		160	K160N-HN	0.755826	0.906438	0.833614		overlap with R162/E243 but not too bad				160	K160N-HN	0.755826	0.906438	0.833614		overlap with R162/E243 but not too bad
	W164N-HN	3660000	1635000	1721000	1846000	1498000		0.446721	1.07263	0.870424	0.31442	0.817071	0		161	K161N-HN	0.817392	0.995326	0.894362						161	K161N-HN	0.817392	0.995326	0.894362
	K165N-HN	2308000	381800	980400	1125000	534700		0.165425	1.14749	0.54539	0.116433	0.874094	0		162	R162N-HN	0.927948	1.02425	0.966328		overlap with E243				162	R162N-HN					overlap with E243
	Y167N-HN	3296000	1363000	1418000	2011000	1679000		0.413532	1.41819	1.18406	0.29106	1.0803	0		163										163
	Y168N-HN	1882000	774300	576400	744400	597200		0.411424	1.29146	1.03609	0.289577	0.983765	0		164	W164N-HN	0.82609	0.754962	0.66304		overlap badly with L220/A230				164	W164N-HN					overlap badly with L220/A230
	K169N-HN	2396000	1029000	1038000	1116000	898300		0.429466	1.07514	0.865414	0.302275	0.818984	0		165	K165N-HN	0.305908	0.80765	0.415447						165	K165N-HN	0.305908	0.80765	0.415447
	L170N-HN	1793000	814700	913300	987800	710900		0.454378	1.08157	0.778386	0.31981	0.823881	0		166										166
	T171N-HN	1837000	871900	757700	1011000	923700		0.474633	1.3343	1.21908	0.334066	1.0164	0		167	Y167N-HN	0.764715	0.998182	0.901952		overlap with F208				167	Y167N-HN					overlap with F208
	W172N-HN	2368000	1220000	1085000	1444000	1175000		0.515203	1.33088	1.08295	0.36262	1.01379	0		168	Y168N-HN	0.760817	0.908985	0.789232						168	Y168N-HN	0.760817	0.908985	0.789232
	E173N-HN	3433000	1620000	1535000	1802000	1697000		0.47189	1.17394	1.10554	0.332136	0.894242	0		169	K169N-HN	0.794181	0.75673	0.659224						169	K169N-HN	0.794181	0.75673	0.659224
	E174N-HN	2742000	1538000	1304000	1462000	1238000		0.560904	1.12117	0.949387	0.394787	0.854041	0		170	L170N-HN	0.840249	0.761254	0.592931						170	L170N-HN	0.840249	0.761254	0.592931
	K175N-HN	2542000	1256000	1108000	1440000	1332000		0.494099	1.29964	1.20217	0.347767	0.989992	0		171	T171N-HN	0.877704	0.939135	0.928629						171	T171N-HN	0.877704	0.939135	0.928629
	K176N-HN	3001000	1587000	1223000	1918000	1589000		0.528824	1.56827	1.29926	0.372207	1.19462	0		172	W172N-HN	0.952728	0.936724	0.82493						172	W172N-HN	0.952728	0.936724	0.82493
	K177N-HN	2839000	1385000	1220000	1624000	1318000		0.487848	1.33115	1.08033	0.343367	1.01399	0		173	E173N-HN	0.872634	0.826267	0.842136						173	E173N-HN	0.872634	0.826267	0.842136
	F178N-HN	6678000	2919000	2099000	3263000	3024000		0.437107	1.55455	1.44069	0.307653	1.18417	0		174	E174N-HN	1.03724	0.789122	0.723189						174	E174N-HN	1.03724	0.789122	0.723189
	D179N-HN	2257000	1109000	810700	1126000	1179000		0.49136	1.38892	1.4543	0.345839	1.058	0		175	K175N-HN	0.913703	0.914738	0.915742						175	K175N-HN	0.913703	0.914738	0.915742
	E180N-HN	6678000	2919000	2099000	3263000	3024000		0.437107	1.55455	1.44069	0.307653	1.18417	0		176	K176N-HN	0.977916	1.10381	0.989706						176	K176N-HN	0.977916	1.10381	0.989706
	K181N-HN	4040000	1534000	1607000	2110000	1678000		0.379703	1.31301	1.04418	0.26725	1.00017	0		177	K177N-HN	0.902143	0.936915	0.822933						177	K177N-HN	0.902143	0.936915	0.822933
	Q182N-HN	3944000	1720000	1508000	2179000	1859000		0.436105	1.44496	1.23276	0.306949	1.10069	0		178	F178N-HN	0.808311	1.09415	1.09743						178	F178N-HN	0.808311	1.09415	1.09743
	S183N-HN	3945000	2014000	1653000	2217000	1920000		0.51052	1.3412	1.16152	0.359324	1.02165	0		179	D179N-HN	0.908638	0.97758	1.1078						179	D179N-HN	0.908638	0.97758	1.1078
	L184N-HN	3463000	1604000	1551000	1988000	1656000		0.463182	1.28175	1.0677	0.326006	0.976368	0		180	E180N-HN	0.808311	1.09415	1.09743						180	E180N-HN	0.808311	1.09415	1.09743
	R185N-HN	9106000	4181000	3180000	4449000	4313000		0.459148	1.39906	1.35629	0.323167	1.06572	0		181	K181N-HN	0.702158	0.924146	0.795399						181	K181N-HN	0.702158	0.924146	0.795399
	S187N-HN	4722000	2573000	2104000	2711000	2496000		0.544896	1.2885	1.18631	0.38352	0.981505	0		182	Q182N-HN	0.806459	1.01702	0.939046						182	Q182N-HN	0.806459	1.01702	0.939046
	R188N-HN	9379000	4063000	3674000	4391000	4070000		0.433202	1.19516	1.10778	0.304905	0.910402	0		183	S183N-HN	0.944068	0.943989	0.884784						183	S183N-HN	0.944068	0.943989	0.884784
	I189N-HN	8043000	3543000	2634000	3615000	3461000		0.440507	1.37244	1.31397	0.310047	1.04545	0		184	L184N-HN	0.85653	0.90215	0.813312						184	L184N-HN	0.85653	0.90215	0.813312
	R190N-HN	4236000	1892000	1464000	2360000	2257000		0.446648	1.61202	1.54167	0.314369	1.22795	0		185	R185N-HN	0.84907	0.984712	1.03314						185	R185N-HN	0.84907	0.984712	1.03314
	A191N-HN	4801000	2204000	1764000	2395000	2123000		0.459071	1.35771	1.20351	0.323113	1.03423	0		186						overlap with R188 and L209				186						overlap with R188 and L209
	E192N-HN	4193000	1745000	1392000	2224000	1800000		0.41617	1.5977	1.2931	0.292917	1.21704	0		187	S187N-HN	1.00764	0.906897	0.903665		overlap with T205 but not too bad				187	S187N-HN	1.00764	0.906897	0.903665		overlap with T205 but not too bad
	M193N-HN	4303000	2437000	1855000	2594000	2232000		0.566349	1.39838	1.20323	0.398619	1.06521	0		188	R188N-HN	0.80109	0.841198	0.843848						188	R188N-HN	0.80109	0.841198	0.843848
	F194N-HN	6903000	3406000	2698000	3746000	3413000		0.493409	1.38844	1.26501	0.347281	1.05763	0		189	I189N-HN	0.814599	0.965977	1.00091						189	I189N-HN	0.814599	0.965977	1.00091
	A195N-HN	4650000	2140000	2045000	2296000	1903000		0.460215	1.12274	0.930562	0.323918	0.855239	0		190	R190N-HN	0.825954	1.13461	1.17435						190	R190N-HN	0.825954	1.13461	1.17435
	K196N-HN	5012000	2344000	1818000	2574000	2511000		0.467678	1.41584	1.38119	0.32917	1.07851	0		191	A191N-HN	0.848928	0.955611	0.91677						191	A191N-HN	0.848928	0.955611	0.91677
	G197N-HN	3070000	1557000	1171000	1562000	1623000		0.507166	1.3339	1.38599	0.356964	1.01609	0		192	E192N-HN	0.769593	1.12453	0.985013						192	E192N-HN	0.769593	1.12453	0.985013
	Q198N-HN	5961000	2964000	2538000	3540000	2969000		0.497232	1.3948	1.16982	0.349972	1.06248	0		193	M193N-HN	1.04731	0.984238	0.916556						193	M193N-HN	1.04731	0.984238	0.916556
	V200N-HN	5125000	2676000	2200000	2876000	2506000		0.522146	1.30727	1.13909	0.367508	0.995807	0		194	F194N-HN	0.912426	0.977237	0.963614						194	F194N-HN	0.912426	0.977237	0.963614
	A201N-HN	4615000	1695000	1783000	2094000	1655000		0.367281	1.17443	0.928211	0.258507	0.894611	0		195	A195N-HN	0.851043	0.790228	0.70885						195	A195N-HN	0.851043	0.790228	0.70885
	Y203N-HN	4576000	1946000	1851000	2245000	1977000		0.425262	1.21286	1.06807	0.299317	0.923887	0		196	K196N-HN	0.864843	0.996526	1.05211						196	K196N-HN	0.864843	0.996526	1.05211
	N204N-HN	4430000	1883000	1661000	2306000	2055000		0.425056	1.38832	1.23721	0.299172	1.05754	0		197	G197N-HN	0.937866	0.938854	1.05577						197	G197N-HN	0.937866	0.938854	1.05577
	T205N-HN	4055000	2078000	1743000	2203000	1895000		0.512454	1.26391	1.08721	0.360686	0.962777	0		198	Q198N-HN	0.919496	0.981716	0.891102						198	Q198N-HN	0.919496	0.981716	0.891102
	T206N-HN	4265000	2137000	1776000	2470000	2196000		0.501055	1.39077	1.23649	0.352663	1.05941	0		199										199
	Q207N-HN	5094000	2516000	2120000	2764000	2344000		0.493914	1.30377	1.10566	0.347637	0.993141	0		200	V200N-HN	0.965568	0.920111	0.867695		Not overlapping, not sure what's wrong				200	V200N-HN	0.965568	0.920111	0.867695		Not overlapping, not sure what's wrong
	F208N-HN	6346000	2992000	2681000	3516000	3098000		0.471478	1.31145	1.15554	0.331845	0.998989	0		201	A201N-HN	0.679186	0.826608	0.707059						201	A201N-HN	0.679186	0.826608	0.707059
	L209N-HN	9379000	4063000	3674000	4391000	4070000		0.433202	1.19516	1.10778	0.304905	0.910402	0		202										202
	M210N-HN	7797000	3909000	3139000	4308000	3907000		0.501347	1.37241	1.24466	0.352868	1.04543	0		203	Y203N-HN	0.786407	0.853658	0.813596						203	Y203N-HN	0.786407	0.853658	0.813596
	D211N-HN	6957000	3706000	3182000	3904000	3478000		0.532701	1.2269	1.09302	0.374936	0.934584	0		204	N204N-HN	0.786027	0.977156	0.942434		overlap with D235 but not too bad				204	N204N-HN	0.786027	0.977156	0.942434		overlap with D235 but not too bad
	D212N-HN	13830000	6992000	5514000	8019000	7436000		0.505568	1.4543	1.34857	0.355839	1.1078	0		205	T205N-HN	0.947645	0.889593	0.828172						205	T205N-HN	0.947645	0.889593	0.828172
	H213N-HN	5700000	3279000	2471000	3667000	3205000		0.575263	1.48401	1.29705	0.404893	1.13044	0		206	T206N-HN	0.926566	0.978877	0.941886						206	T206N-HN	0.926566	0.978877	0.941886
	D214N-HN	6295000	3326000	2505000	3746000	3203000		0.528356	1.49541	1.27864	0.371878	1.13912	0		207	Q207N-HN	0.913361	0.917648	0.84223						207	Q207N-HN	0.913361	0.917648	0.84223
	Q215N-HN	6674000	3651000	2783000	3938000	3571000		0.547048	1.41502	1.28315	0.385035	1.07788	0		208	F208N-HN	0.871871	0.923052	0.880224						208	F208N-HN	0.871871	0.923052	0.880224
	E216N-HN	6536000	3200000	2381000	3629000	3170000		0.489596	1.52415	1.33137	0.344597	1.16101	0		209	L209N-HN	0.80109	0.841198	0.843848						209	L209N-HN	0.80109	0.841198	0.843848
	E217N-HN	6912000	3712000	2909000	3875000	3491000		0.537037	1.33207	1.20007	0.377988	1.0147	0		210	M210N-HN	0.927105	0.965959	0.948115						210	M210N-HN	0.927105	0.965959	0.948115
	D219N-HN	6034000	3029000	2471000	3098000	2958000		0.501989	1.25374	1.19709	0.35332	0.955031	0		211	D211N-HN	0.985086	0.863543	0.832603						211	D211N-HN	0.985086	0.863543	0.832603
	L220N-HN	18710000	9463000	7477000	10250000	9339000		0.505772	1.37087	1.24903	0.355983	1.04425	0		212	D212N-HN	0.93491	1.02359	1.02726		overlap with K232				212	D212N-HN					overlap with K232
	K221N-HN	6240000	3104000	2279000	3389000	2896000		0.497436	1.48706	1.27073	0.350115	1.13276	0		213	H213N-HN	1.06379	1.04451	0.988016						213	H213N-HN	1.06379	1.04451	0.988016
	T222N-HN	5323000	2566000	2143000	2670000	2473000		0.482059	1.24592	1.15399	0.339293	0.949069	0		214	D214N-HN	0.977051	1.05253	0.973998						214	D214N-HN	0.977051	1.05253	0.973998
	G223N-HN	4864000	2584000	2172000	2961000	2374000		0.53125	1.36326	1.093	0.373915	1.03845	0		215	Q215N-HN	1.01162	0.995948	0.977429						215	Q215N-HN	1.01162	0.995948	0.977429
	L224N-HN	5604000	2758000	2219000	2792000	2747000		0.492148	1.25822	1.23795	0.346394	0.958444	0		216	E216N-HN	0.905375	1.07276	1.01417						216	E216N-HN	0.905375	1.07276	1.01417
	Y225N-HN	6367000	3124000	2582000	3588000	3001000		0.490655	1.38962	1.16228	0.345343	1.05853	0		217	E217N-HN	0.993105	0.937567	0.914145						217	E217N-HN	0.993105	0.937567	0.914145
	S226N-HN	4472000	2104000	1759000	2334000	2253000		0.470483	1.32689	1.28084	0.331145	1.01075	0		218										218
	K227N-HN	6320000	3177000	2584000	3398000	3160000		0.50269	1.31502	1.22291	0.353813	1.0017	0		219	D219N-HN	0.928292	0.882435	0.911873						219	D219N-HN	0.928292	0.882435	0.911873
	R228N-HN	7086000	3613000	2950000	3831000	3532000		0.509879	1.29864	1.19729	0.358873	0.989234	0		220	L220N-HN	0.935289	0.964874	0.951441		overlap with A230				220	L220N-HN					overlap with A230
	A229N-HN	6583000	3421000	2649000	3573000	3208000		0.519672	1.34881	1.21102	0.365766	1.02745	0		221	K221N-HN	0.919873	1.04665	0.967973						221	K221N-HN	0.919873	1.04665	0.967973
	A230N-HN	18710000	9463000	7477000	10250000	9339000		0.505772	1.37087	1.24903	0.355983	1.04425	0		222	T222N-HN	0.891438	0.876927	0.879044						222	T222N-HN	0.891438	0.876927	0.879044
	K232N-HN	13830000	6992000	5514000	8019000	7436000		0.505568	1.4543	1.34857	0.355839	1.1078	0		223	G223N-HN	0.982403	0.959517	0.832587						223	G223N-HN	0.982403	0.959517	0.832587
	S233N-HN	4941000	2534000	2097000	2694000	2600000		0.512852	1.28469	1.23987	0.360966	0.978606	0		224	L224N-HN	0.910095	0.885589	0.942997						224	L224N-HN	0.910095	0.885589	0.942997
	D234N-HN	7393000	4163000	3185000	4480000	4179000		0.5631	1.40659	1.31209	0.396333	1.07146	0		225	Y225N-HN	0.907334	0.978071	0.885357						225	Y225N-HN	0.907334	0.978071	0.885357
	D235N-HN	10130000	4536000	3511000	5080000	4613000		0.447779	1.44688	1.31387	0.315165	1.10215	0		226	S226N-HN	0.870031	0.933919	0.975673						226	S226N-HN	0.870031	0.933919	0.975673
	T236N-HN	6835000	3430000	2739000	3646000	3560000		0.501829	1.33114	1.29974	0.353207	1.01399	0		227	K227N-HN	0.929589	0.925561	0.931544						227	K227N-HN	0.929589	0.925561	0.931544
	S237N-HN	6571000	3677000	2697000	4085000	3787000		0.55958	1.51465	1.40415	0.393855	1.15377	0		228	R228N-HN	0.942883	0.914038	0.912027						228	R228N-HN	0.942883	0.914038	0.912027
	D238N-HN	7309000	3855000	3042000	4347000	4010000		0.527432	1.42899	1.31821	0.371228	1.08853	0		229	A229N-HN	0.960992	0.949347	0.922489						229	A229N-HN	0.960992	0.949347	0.922489
	D239N-HN	11920000	6189000	4732000	6938000	6412000		0.519211	1.46619	1.35503	0.365442	1.11686	0		230	A230N-HN	0.935289	0.964874	0.951441		overlap with L220				230	A230N-HN					overlap with L220
	D240N-HN	11920000	6189000	4732000	6938000	6412000		0.519211	1.46619	1.35503	0.365442	1.11686	0		231										231
	F241N-HN	6903000	3406000	2698000	3746000	3413000		0.493409	1.38844	1.26501	0.347281	1.05763	0		232	K232N-HN	0.93491	1.02359	1.02726		overlap with D212				232	K232N-HN					overlap with D212
	M242N-HN	5543000	2706000	2164000	2958000	2694000		0.488183	1.36691	1.24492	0.343603	1.04124	0		233	S233N-HN	0.94838	0.904218	0.94446						233	S233N-HN	0.94838	0.904218	0.94446
	E243N-HN	11650000	5846000	4859000	7071000	6164000		0.501803	1.45524	1.26857	0.353189	1.10852	0		234	D234N-HN	1.0413	0.990017	0.999475						234	D234N-HN	1.0413	0.990017	0.999475
	E244N-HN	6204000	3467000	2554000	3423000	3317000		0.558833	1.34025	1.29875	0.393329	1.02093	0		235	D235N-HN	0.828046	1.01837	1.00083		overlap with N204				235	D235N-HN					overlap with N204
	G245N-HN	5873000	3155000	2512000	3393000	3150000		0.537204	1.35072	1.25398	0.378106	1.0289	0		236	T236N-HN	0.927997	0.936912	0.990072						236	T236N-HN	0.927997	0.936912	0.990072
	G246N-HN	8621000	4127000	3319000	4503000	4110000		0.478715	1.35673	1.23832	0.336939	1.03348	0		237	S237N-HN	1.03479	1.06607	1.0696						237	S237N-HN	1.03479	1.06607	1.0696
	E247N-HN	8952000	4469000	3691000	5354000	4808000		0.499218	1.45056	1.30263	0.35137	1.10495	0		238	D238N-HN	0.975343	1.00578	1.00414		overlap with R146				238	D238N-HN					overlap with R146
	E248N-HN	7921000	4154000	3057000	4513000	4166000		0.524429	1.47628	1.36277	0.369114	1.12455	0		239	D239N-HN	0.960141	1.03196	1.03219		overlap with D340				239	D239N-HN					overlap with D340
	D249N-HN	8357000	3964000	2850000	4417000	4035000		0.474333	1.54982	1.41579	0.333855	1.18057	0		240	D240N-HN	0.960141	1.03196	1.03219		overlap with D239				240	D240N-HN					overlap with D239
	G250N-HN	7185000	3751000	2868000	4118000	3923000		0.52206	1.43584	1.36785	0.367447	1.09374	0		241	F241N-HN	0.912426	0.977237	0.963614						241	F241N-HN	0.912426	0.977237	0.963614
	G251N-HN	9667000	5135000	4264000	6008000	5682000		0.531189	1.40901	1.33255	0.373872	1.0733	0		242	M242N-HN	0.902763	0.962088	0.948307						242	M242N-HN	0.902763	0.962088	0.948307
	S252N-HN	7015000	4073000	3226000	4795000	4325000		0.580613	1.48636	1.34067	0.408659	1.13223	0		243	E243N-HN	0.927948	1.02425	0.966328		overlap with R162/E243				243	E243N-HN					overlap with R162/E243
	D253N-HN	9343000	4962000	3968000	5336000	5032000		0.531093	1.34476	1.26815	0.373804	1.02436	0		244	E244N-HN	1.03341	0.943322	0.989312						244	E244N-HN	1.03341	0.943322	0.989312
	W164NE-HE	5854000	2297000	2932000	2764000	2390000		0.392381	0.942701	0.815143	0.276174	0.718097	0		245	G245N-HN	0.993414	0.950689	0.955212						245	G245N-HN	0.993414	0.950689	0.955212
	W172NE-HE	5070000	1021000	2369000	2184000	1477000		0.201381	0.921908	0.62347	0.14174	0.702257	0		246	G246N-HN	0.885253	0.954924	0.943286		overlap with G251 a bit				246	G246N-HN					overlap with G251 a bit
										AVG	0.337949	1.03691	0		247	E247N-HN	0.923169	1.02096	0.992268						247	E247N-HN	0.923169	1.02096	0.992268
	12	22	32	42	3 vs 12	22 vs 32	22 vs 42			STD	0.0449545	0.0984606	0		248	E248N-HN	0.969789	1.03907	1.03808						248	E248N-HN	0.969789	1.03907	1.03808
	3235000	2617000	3797000	3434000	0	0.689228	0.762085			AVG-STD	0.292995	0.938445	0		249	D249N-HN	0.87715	1.09083	1.07847						249	D249N-HN	0.87715	1.09083	1.07847
	5135000	4264000	6008000	5682000	0	0.70972	0.75044			AVG-0.5STD	0.315472	0.987675	0		250	G250N-HN	0.965408	1.0106	1.04195						250	G250N-HN	0.965408	1.0106	1.04195
	4073000	3226000	4795000	4325000	0	0.672784	0.745896								251	G251N-HN	0.98229	0.991715	1.01506						251	G251N-HN	0.98229	0.991715	1.01506
	4962000	3968000	5336000	5032000	0	0.743628	0.788553								252	S252N-HN	1.07369	1.04616	1.02125						252	S252N-HN	1.07369	1.04616	1.02125
				AVG	0	0.70384	0.761744								253	D253N-HN	0.982112	0.946495	0.966001						253	D253N-HN	0.982112	0.946495	0.966001
																W164NE-HE	0.725603	0.663511	0.62093							W164NE-HE	0.725603	0.663511	0.62093
																W172NE-HE	0.372399	0.648876	0.474924							W172NE-HE	0.372399	0.648876	0.474924
																AVG	0.887908	0.958086	0.92059							AVG	0.887908	0.958086	0.92059
																STD	0.118111	0.0909762	0.123804							STD	0.118111	0.0909762	0.123804
																AVG-STD	0.769797	0.86711	0.796786							AVG-STD	0.769797	0.86711	0.796786
																AVG-0.5STD	0.828852	0.912598	0.858688							AVG-0.5STD	0.828852	0.912598	0.858688

## Sheet: Fig4A, A201
15N A201C-MTSL 11202023	15N BR-L-AR-A201C						15N BR-L-AR-A201C-MTSL								Assignment	Raw ratios	142	Assignment
PRE set	Assignment	w1	w2	Data_Height	S/N		Assignment	w1	w2	Data_Height	S/N		Raw ratios				143			Notes/checking
Fig. 4A															Q144N-H	0.505039	144	Q144N-H	0.505039			0.505039
	Q144N-H	121.852	8.589	4335485	65		Q144N-H	121.852	8.589	2189587	12		0.505039		Q145N-H	0.573119	145	Q145N-H	0.573119			0.573119
	Q145N-H	121.936	8.517	5126657	77		Q145N-H	121.936	8.517	2938187	17		0.573119		R146N-H	0.471313	146	R146N-H	0.471313	overlap with D238
	R146N-H	122.625	8.444	6133452	92		R146N-H	122.625	8.444	2890777	16		0.471313		Q147N-H	0.552807	147	Q147N-H	0.552807			0.552807
	Q147N-H	121.806	8.518	4872690	73		Q147N-H	121.806	8.518	2693656	15		0.552807		L148N-H	0.590899	148	L148N-H	0.590899			0.590899
	L148N-H	124.037	8.382	4639896	69		L148N-H	124.11	8.386	2741708	16		0.590899		G149N-H	0.662737	149	G149N-H	0.662737			0.662737
	G149N-H	109.719	8.467	3435349	51		G149N-H	109.741	8.461	2276732	13		0.662737		K150N-H	0.582788	150	K150N-H	0.582788			0.582788
	K150N-H	121.032	8.197	4474298	67		K150N-H	121.093	8.197	2607566	15		0.582788		K151N-H	0.688533	151	K151N-H	0.688533			0.688533
	K151N-H	120.699	8.562	2036842	30		K151N-H	121.123	8.532	1402433	8		0.688533		K152N-H	0.579442	152	K152N-H	0.579442			0.579442
	K152N-H	122.474	8.406	3602772	54		K152N-H	122.85	8.431	2087597	12		0.579442		R154N-H	0.664044	153
	R154N-H	123.62	8.601	2487680	37		R154N-H	123.62	8.601	1651930	9		0.664044		R155N-H	0.384722	154	R154N-H	0.664044	overlap with R155
	R155N-H	123.534	8.602	3189424	48		R155N-H	123.534	8.602	1227042	7		0.384722		R156N-H	0.0585905	155	R155N-H	0.384722	overlap with R154
	R156N-H	124.311	8.578	2234730	33		R156N-H	124.311	8.578	130934	1		0.0585905		S158N-H	0.86546	156	R156N-H	0.0585905			0.0585905
	S158N-H	116.804	8.516	2098800	31		S158N-H	117.082	8.533	1816427	10		0.86546		K159N-H	0.731983	157
	K159N-H	123.801	8.52	1838797	28		K159N-H	124.054	8.521	1345968	8		0.731983		K160N-H		158	S158N-H	0.86546			0.86546
	K160N-H	122.909	8.35	948452	14		K160N-H	122.874	8.344	1783766	10			outlier	K161N-H	0.785499	159	K159N-H	0.731983			0.731983
	K161N-H	122.345	8.329	2395349	36		K161N-H	122.431	8.298	1881544	11		0.785499		R162N-H	0.866534	160	K160N-H		overlap with R162/E243
	R162N-H	122.943	8.397	6098898	91		R162N-H	122.973	8.378	5284900	30		0.866534		W164N-H		161	K161N-H	0.785499			0.785499
	W164N-H	123.488	8.245	4495662	67		W164N-H	123.488	8.245	6390251	36			outlier	W164NE-HE	0.220749	162	R162N-H	0.866534	overlap with E243
	W164NE-HE	129.561	10.195	3046947	46		W164NE-HE	129.561	10.195	672612	4		0.220749		K165N-H	-0.398202	163
	K165N-H	124.935	7.947	734520	11		K165N-H	124.935	7.947	-292487	2		-0.398202		Y167N-H	0.230885	164	W164N-H		overlap badly with L220/A230
	Y167N-H	120.456	8.052	2906858	44		Y167N-H	120.456	8.052	671149	4		0.230885		Y168N-H	1.11311	165	K165N-H	-0.398202			-0.398202
	Y168N-H	114.906	7.647	693785	10		Y168N-H	114.863	7.64	772256	4		1.11311		K169N-H	0.620244	166
	K169N-H	120.745	7.646	909358	14		K169N-H	120.383	7.625	564024	3		0.620244		L170N-H	0.708239	167	Y167N-H	0.230885			0.230885
	L170N-H	121.891	7.507	496945	7		L170N-H	121.891	7.507	351956	2		0.708239		T171N-H	0.0410888	168	Y168N-H	1.11311			1.11311
	T171N-H	113.796	8.733	741249	11		T171N-H	113.796	8.733	30457	0		0.0410888		W172N-H	-0.127052	169	K169N-H	0.620244			0.620244
	W172N-H	121.898	8.807	847803	13		W172N-H	121.898	8.807	-107715	1		-0.127052		W172NE-HE	0.0158711	170	L170N-H	0.708239			0.708239
	W172NE-HE	129.875	10.187	2384467	36		W172NE-HE	129.875	10.187	37844	0		0.0158711		E173N-H	-0.141627	171	T171N-H	0.0410888			0.0410888
	E173N-H	119.025	8.515	1350284	20		E173N-H	119.025	8.515	-191236	1		-0.141627		E174N-H		172	W172N-H	-0.127052			-0.127052
	E174N-H	120.067	7.704	982155	15		E174N-H	119.613	7.67	1323504	7			outlier	K175N-H	0.100897	173	E173N-H	-0.141627			-0.141627
	K175N-H	122.351	8.745	860445	13		K175N-H	122.351	8.745	86816	0		0.100897		K176N-H	0.442297	174	E174N-H
	K176N-H	119.021	7.777	1413240	21		K176N-H	118.788	7.732	625072	4		0.442297		K177N-H	0.506064	175	K175N-H	0.100897			0.100897
	K177N-H	118.676	7.571	1179694	18		K177N-H	118.568	7.583	597001	3		0.506064		F178N-H	0.286615	176	K176N-H	0.442297			0.442297
	F178N-H	121.351	8.195	1849803	28		F178N-H	121.351	8.195	530181	3		0.286615		D179N-H	-0.214278	177	K177N-H	0.506064			0.506064
	D179N-H	121.224	8.849	946495	14		D179N-H	121.224	8.849	-202813	1		-0.214278		E180N-H	0.482862	178	F178N-H	0.286615			0.286615
	E180N-H	121.796	8.269	1281655	19		E180N-H	121.523	8.267	618862	4		0.482862		K181N-H	0.427621	179	D179N-H	-0.214278			-0.214278
	K181N-H	120.201	7.987	1543185	23		K181N-H	119.764	7.948	659898	4		0.427621		Q182N-H	-0.0596933	180	E180N-H	0.482862			0.482862
	Q182N-H	119.311	8.218	1653920	25		Q182N-H	119.311	8.218	-98728	1		-0.0596933		S183N-H	0.145989	181	K181N-H	0.427621			0.427621
	S183N-H	116.112	8.188	1794870	27		S183N-H	116.112	8.188	262032	1		0.145989		L184N-H	0.370347	182	Q182N-H	-0.0596933			-0.0596933
	L184N-H	123.535	8.03	1954924	29		L184N-H	123.544	8.03	724000	4		0.370347		R185N-H	0.0396369	183	S183N-H	0.145989			0.145989
	R185N-H	120.471	8.009	1821864	27		R185N-H	120.471	8.009	72213	0		0.0396369		A186N-H	0.965587	184	L184N-H	0.370347			0.370347
	A186N-H	122.823	8.133	1611731	24		A186N-H	122.823	8.133	1556266	9		0.965587		S187N-H	0.237345	185	R185N-H	0.0396369			0.0396369
	S187N-H	114.148	8.147	2273780	34		S187N-H	114.148	8.147	539670	3		0.237345		R188N-H	1.01596	186	A186N-H	0.965587	overlap with R188 and L209
	R188N-H	122.989	8.134	2454502	37		R188N-H	122.971	8.136	2493674	14		1.01596		I189N-H	0.188998	187	S187N-H	0.237345	overlap with T205	keep	0.237345
	I189N-H	120.737	8.063	2108499	32		I189N-H	120.737	8.063	398502	2		0.188998		R190N-H	0.350591	188	R188N-H	1.01596			1.01596
	R190N-H	122.182	8.134	1442634	22		R190N-H	122.328	8.138	505774	3		0.350591		A191N-H	0.310325	189	I189N-H	0.188998			0.188998
	A191N-H	122.182	8.134	1442634	22		A191N-H	122.303	8.136	447685	3		0.310325		E192N-H	-0.022897	190	R190N-H	0.350591	overlap at the same spot with A191
	E192N-H	119.212	8.297	1690962	25		E192N-H	119.212	8.297	-38718	0		-0.022897		M193N-H	0.189594	191	A191N-H	0.310325
	M193N-H	119.226	8.162	1864586	28		M193N-H	119.226	8.162	353514	2		0.189594		F194N-H	0.0556947	192	E192N-H	-0.022897			-0.022897
	F194N-H	119.717	8.121	2216442	33		F194N-H	119.717	8.121	123444	1		0.0556947		A195N-H	0.091556	193	M193N-H	0.189594			0.189594
	A195N-H	123.719	8.078	2115482	32		A195N-H	123.719	8.078	193685	1		0.091556		K196N-H	0.0222121	194	F194N-H	0.0556947			0.0556947
	K196N-H	118.925	8.11	1719560	26		K196N-H	118.925	8.11	38195	0		0.0222121		G197N-H	-0.313246	195	A195N-H	0.091556			0.091556
	G197N-H	109.364	8.263	1455749	22		G197N-H	109.364	8.263	-456008	3		-0.313246		Q198N-H	0.448321	196	K196N-H	0.0222121			0.0222121
	Q198N-H	120.335	8.566	4528748	68		Q198N-H	120.351	8.563	2030331	12		0.448321		V200N-H		197	G197N-H	-0.313246			-0.313246
	V200N-H	120.459	8.11	1352921	20		V200N-H	120.459	8.11	3962826	22			outlier	C201?N-H	-0.0736972	198	Q198N-H	0.448321			0.448321
	C201?N-H	124.773	8.429	2213762	33		C201?N-H	124.773	8.429	-163148	1		-0.0736972		Y203N-H	0.387282	199
	Y203N-H	119.383	7.943	1937110	29		Y203N-H	119.389	7.924	750208	4		0.387282		N204N-H		200	V200N-H
	N204N-H	120.479	8.252	2616647	39		N204N-H	120.479	8.252	4103079	23			outlier	T205N-H	0.0214599	201	C201?N-H	-0.0736972			-0.0736972
	T205N-H	114.024	8.135	3072751	46		T205N-H	114.024	8.135	65941	0		0.0214599		T206N-H	0.115651	202
	T206N-H	115.723	8.155	2360736	35		T206N-H	115.723	8.155	273022	2		0.115651		Q207N-H	0.303359	203	Y203N-H	0.387282			0.387282
	Q207N-H	122.034	8.183	2092824	31		Q207N-H	122.217	8.181	634877	4		0.303359		F208N-H	0.242915	204	N204N-H		overlap with D235
	F208N-H	120.494	8.14	1988602	30		F208N-H	120.494	8.14	483062	3		0.242915		L209N-H	0.151221	205	T205N-H	0.0214599			0.0214599
	L209N-H	122.766	8.115	1705169	26		L209N-H	122.766	8.115	257858	1		0.151221		M210N-H	0.136939	206	T206N-H	0.115651			0.115651
	M210N-H	120.858	8.293	6057184	91		M210N-H	120.878	8.306	829463	5		0.136939		D211N-H	0.676048	207	Q207N-H	0.303359			0.303359
	D211N-H	121.472	8.315	2888150	43		D211N-H	121.536	8.368	1952527	11		0.676048		D212N-H	0.664882	208	F208N-H	0.242915			0.242915
	D212N-H	120.884	8.329	3773988	57		D212N-H	121.136	8.353	2509255	14		0.664882		H213N-H	0.616416	209	L209N-H	0.151221			0.151221
	H213N-H	118.597	8.423	3189772	48		H213N-H	118.597	8.423	1966225	11		0.616416		D214N-H	0.539836	210	M210N-H	0.136939			0.136939
	D214N-H	121.1	8.455	2794382	42		D214N-H	121.251	8.471	1508507	9		0.539836		Q215N-H	0.839228	211	D211N-H	0.676048			0.676048
	Q215N-H	119.868	8.313	2912626	44		Q215N-H	120.024	8.332	2444356	14		0.839228		E216N-H	0.705401	212	D212N-H	0.664882	overlap with K232
	E216N-H	121.768	8.39	2889277	43		E216N-H	121.875	8.405	2038099	12		0.705401		E217N-H	0.632502	213	H213N-H	0.616416			0.616416
	E217N-H	123.067	8.459	3065704	46		E217N-H	123.384	8.489	1939063	11		0.632502		D219N-H	0.740512	214	D214N-H	0.539836			0.539836
	D219N-H	120.086	8.429	2944718	44		D219N-H	120.19	8.451	2180598	12		0.740512		L220N-H	0.187004	215	Q215N-H	0.839228			0.839228
	L220N-H	123.313	8.223	7044148	105		L220N-H	123.313	8.223	1317285	7		0.187004		K221N-H	0.750282	216	E216N-H	0.705401			0.705401
	K221N-H	120.411	8.391	2668098	40		K221N-H	120.669	8.402	2001826	11		0.750282		T222N-H	0.700943	217	E217N-H	0.632502			0.632502
	T222N-H	112.41	8.022	2421682	36		T222N-H	112.862	8.034	1697462	10		0.700943		G223N-H	0.701672	218
	G223N-H	110.717	8.351	2467314	37		G223N-H	110.768	8.368	1731246	10		0.701672		L224N-H	0.654685	219	D219N-H	0.740512			0.740512
	L224N-H	121.431	8.01	2695944	40		L224N-H	121.583	8.021	1764994	10		0.654685		Y225N-H	0.62903	220	L220N-H	0.187004	overlap with A230
	Y225N-H	119.943	8.258	3638859	54		Y225N-H	120.076	8.249	2288952	13		0.62903		S226N-H	0.709965	221	K221N-H	0.750282			0.750282
	S226N-H	116.964	8.14	2363517	35		S226N-H	117.137	8.117	1678014	10		0.709965		K227N-H	0.756651	222	T222N-H	0.700943			0.700943
	K227N-H	123.382	8.32	3274920	49		K227N-H	123.535	8.308	2477972	14		0.756651		R228N-H	0.246523	223	G223N-H	0.701672			0.701672
	R228N-H	122.069	8.216	2481846	37		R228N-H	122.334	8.213	611832	3		0.246523		A229N-H	0.807643	224	L224N-H	0.654685			0.654685
	A229N-H	125.446	8.332	2973917	45		A229N-H	125.662	8.35	2401864	14		0.807643		A230N-H	0.187004	225	Y225N-H	0.62903			0.62903
	A230N-H	123.313	8.223	7044148	105		A230N-H	123.313	8.223	1317285	7		0.187004		K232N-H	0.235384	226	S226N-H	0.709965			0.709965
	K232N-H	120.884	8.329	3773988	57		K232N-H	120.99	8.34	888337	5		0.235384		S233N-H	0.395862	227	K227N-H	0.756651			0.756651
	S233N-H	117.189	8.403	3003612	45		S233N-H	117.229	8.429	1189016	7		0.395862		D234N-H	0.93043	228	R228N-H	0.246523			0.246523
	D234N-H	122.167	8.413	3762436	56		D234N-H	122.167	8.423	3500684	20		0.93043		D235N-H	0.663393	229	A229N-H	0.807643			0.807643
	D235N-H	120.539	8.301	3890596	58		D235N-H	120.402	8.298	2580994	15		0.663393		T236N-H	0.196105	230	A230N-H	0.187004	overlap with L220
	T236N-H	114.017	8.188	3286958	49		T236N-H	114.017	8.188	644589	4		0.196105		S237N-H	0.54016	231
	S237N-H	118.32	8.418	3538722	53		S237N-H	118.32	8.418	1911475	11		0.54016		D238N-H	0.976629	232	K232N-H	0.235384	overlap with D212
	D238N-H	122.712	8.451	4432968	66		D238N-H	122.801	8.459	4329365	25		0.976629		D239N-H	0.889052	233	S233N-H	0.395862			0.395862
	D239N-H	120.346	8.232	5697202	85		D239N-H	120.487	8.236	5065110	29		0.889052		D240N-H	0.889052	234	D234N-H	0.93043			0.93043
	D240N-H	120.346	8.232	5697202	85		D240N-H	120.487	8.236	5065110	29		0.889052		F241N-H	0.13378	235	D235N-H	0.663393	overlap with N204
	F241N-H	119.814	8.093	2599883	39		F241N-H	119.814	8.093	347813	2		0.13378		M242N-H	0.282831	236	T236N-H	0.196105			0.196105
	M242N-H	121.714	8.166	2106053	32		M242N-H	121.661	8.184	595658	3		0.282831		E243N-H	0.866534	237	S237N-H	0.54016			0.54016
	E243N-H	122.937	8.397	6098898	91		E243N-H	122.973	8.378	5284900	30		0.866534		E244N-H	0.05376	238	D238N-H	0.976629	overlap with R146
	E244N-H	122.387	8.556	2891442	43		E244N-H	122.387	8.556	155444	1		0.05376		G245N-H	1.02053	239	D239N-H	0.889052	overlap with D340
	G245N-H	110.437	8.573	2734582	41		G245N-H	110.657	8.591	2790712	16		1.02053		G246N-H	0.563786	240	D240N-H	0.889052	overlap with D239
	G246N-H	108.976	8.371	4867980	73		G246N-H	108.976	8.371	2744499	16		0.563786		E247N-H	0.983349	241	F241N-H	0.13378			0.13378
	E247N-H	120.53	8.523	3879612	58		E247N-H	120.629	8.513	3815013	22		0.983349		E248N-H	0.0540126	242	M242N-H	0.282831			0.282831
	E248N-H	121.746	8.63	3628674	54		E248N-H	121.746	8.63	195994	1		0.0540126		D249N-H	0.823703	243	E243N-H	0.866534	overlap with R162/E243
	D249N-H	121.659	8.423	3874860	58		D249N-H	121.954	8.458	3191732	18		0.823703		G250N-H	0.800817	244	E244N-H	0.05376			0.05376
	G250N-H	109.817	8.439	3621088	54		G250N-H	110.071	8.461	2899829	16		0.800817		G251N-H	1.05664	245	G245N-H	1.02053			1.02053
	G251N-H	109	8.373	4918311	74		G251N-H	109.083	8.378	5196894	29		1.05664		S252N-H	0.872105	246	G246N-H	0.563786	overlap with G251 a bit
	S252N-H	115.683	8.312	4526184	68		S252N-H	115.758	8.318	3947306	22		0.872105		D253N-H	0.725644	247	E247N-H	0.983349			0.983349
	D253N-H	127.629	8.129	5049910	76		D253N-H	127.699	8.122	3664435	21		0.725644			0.467808	248	E248N-H	0.0540126			0.0540126
												AVG	0.453537			0.372869	249	D249N-H	0.823703			0.823703
												STD	0.346228			0.0949396	250	G250N-H	0.800817			0.800817
												AVG-STD	0.107309			0.281374	251	G251N-H	1.05664			1.05664
												AVG-0.5STD	0.280423				252	S252N-H	0.872105			0.872105
																	253	D253N-H	0.725644			0.725644
																		AVG	0.453537		W164NE-HE	0.220749
																		STD	0.346228		W172NE-HE	0.0158711
																		AVG-STD	0.107309
																		AVG-0.5STD	0.280423
																		W164NE-HE	0.220749
																		W172NE-HE	0.0158711

## Sheet: Fig4B, S183
15N S183C-MTSL 10062023		BR-L-AR-S183C			50uM concentration				BR-L-AR-S183C-MTSL			44uM concentration			1.13636		BR-L-AR-S183C-MTSL + 1.2 SL1-dI RNA				44uM concentration		1.13636			MTSL/noMTSL	(MTSL+RNA)/noMTSL		142		MTSL/noMTSL	(MTSL+RNA)/noMTSL			Resolved only	MTSL/noMTSL	(MTSL+RNA)/noMTSL
PRE set		Assignment	w1	w2	Data_Height	S/N			Assignment	w1	w2	Data_Height	S/N	Raw ratios	scale ratios		Assignment	w1	w2	Data_Height	S/N	Raw ratios	scale ratios		Assignment	scale ratios	scale ratios		143	Assignment			Notes/checking
Fig. 4B																													144	Q144N-H	0.772352	0.628231				0.772352	0.628231
		Q144N-H	121.848	8.59	5853374	74			Q144N-H	121.892	8.592	3978362	39	0.67967	0.772352		Q144N-H	121.947	8.515	3235998	34	0.552843	0.628231		Q144N-H	0.772352	0.628231		145	Q145N-H	0.656816	0.522035				0.656816	0.522035
		Q145N-H	121.934	8.517	7240203	91			Q145N-H	121.934	8.517	4184824	41	0.577998	0.656816		Q145N-H	121.782	8.581	3326080	35	0.45939	0.522035		Q145N-H	0.656816	0.522035		146	R146N-H	0.555256	0.115998	overlap with D238
		R146N-H	122.624	8.444	8283236	104			R146N-H	122.624	8.444	4047398	39	0.488625	0.555256		R146N-H	122.624	8.444	845538	9	0.102078	0.115998		R146N-H	0.555256	0.115998		147	Q147N-H	0.61087	0.440634				0.61087	0.440634
		Q147N-H	121.806	8.518	6958536	88			Q147N-H	121.806	8.518	3740668	36	0.537565	0.61087		Q147N-H	122.161	8.576	2698226	29	0.387758	0.440634		Q147N-H	0.61087	0.440634		148	L148N-H	0.65091	0.422472				0.65091	0.422472
		L148N-H	124.036	8.383	6523214	82			L148N-H	124.087	8.387	3736502	36	0.572801	0.65091		L148N-H	123.956	8.392	2425173	26	0.371776	0.422472		L148N-H	0.65091	0.422472		149	G149N-H	0.6633	0.29809				0.6633	0.29809
		G149N-H	109.718	8.468	5037661	63			G149N-H	109.726	8.465	2940505	29	0.583704	0.6633		G149N-H	110.11	8.51	1321476	14	0.262319	0.29809		G149N-H	0.6633	0.29809		150	K150N-H	0.601263	0.274821				0.601263	0.274821
		K150N-H	121.045	8.197	6702410	84			K150N-H	121.045	8.197	3546322	35	0.529111	0.601263		K150N-H	121.18	8.157	1620926	17	0.241842	0.274821		K150N-H	0.601263	0.274821		151	K151N-H	0.302577	0.0229026				0.302577	0.0229026
		K151N-H	120.768	8.551	2738817	34			K151N-H	120.768	8.551	729259	7	0.266268	0.302577		K151N-H	120.768	8.551	55199	1	0.0201543	0.0229026		K151N-H	0.302577	0.0229026		152	K152N-H	0.156202	0.249515				0.156202	0.249515
		K152N-H	122.493	8.408	5499934	69			K152N-H	122.493	8.408	756011	7	0.137458	0.156202		K152N-H	124.121	8.468	1207640	13	0.219574	0.249515		K152N-H	0.156202	0.249515		153
		R154N-H	123.573	8.596	3637101	46			R154N-H	123.573	8.596	1764572	17	0.485159	0.551317										R154N-H	0.551317			154	R154N-H	0.551317		overlap with R155
		R155N-H	123.448	8.605	4226518	53			R155N-H	123.448	8.605	1147364	11	0.271468	0.308486										R155N-H	0.308486			155	R155N-H	0.308486		overlap with R154
		R156N-H	124.325	8.577	2715428	34			R156N-H	124.325	8.577	225583	2	0.0830746	0.0944029										R156N-H	0.0944029			156	R156N-H	0.0944029					0.0944029
		S158N-H	116.818	8.517	2432768	31			S158N-H	116.818	8.517	204557	2	0.0840841	0.0955501		S158N-H	116.818	8.517	28829	0	0.0118503	0.0134662		S158N-H	0.0955501	0.0134662		157
		K159N-H	123.829	8.523	2478993	31			K159N-H	123.829	8.523	339480	3	0.136943	0.155617										K159N-H	0.155617			158	S158N-H	0.0955501	0.0134662				0.0955501	0.0134662
		K160N-H	122.897	8.351	1663705	21			K160N-H	122.833	8.344	1230225	12	0.739449	0.840283		K160N-H	122.916	8.33	349115	4	0.209842	0.238457		K160N-H			outlier	159	K159N-H	0.155617					0.155617
		K161N-H	122.375	8.333	3202628	40			K161N-H	122.375	8.333	487365	5	0.152177	0.172928		K161N-H	122.349	8.354	376340	4	0.11751	0.133534		K161N-H	0.172928	0.133534		160	K160N-H	0.840283	0.238457	overlap with R162/E243
		R162N-H	122.955	8.397	8482497	107			R162N-H	122.983	8.39	4107662	40	0.484252	0.550286		R162N-H	122.965	8.372	3344531	35	0.394286	0.448052		R162N-H	0.550286	0.448052		161	K161N-H	0.172928	0.133534				0.172928	0.133534
		W164N-H	123.404	8.29	2563692	32			W164N-H	123.404	8.29	763126	7	0.297667	0.338258		W164N-H	123.404	8.29	802078	8	0.312861	0.355523		W164N-H			outlier	162	R162N-H	0.550286	0.448052	overlap with E243
		W164NE-HE	129.561	10.195	4208929	53			W164NE-HE	129.561	10.195	496109	5	0.117871	0.133944		W164NE-HE	129.561	10.195	272145	3	0.064659	0.0734761		W164NE-HE	0.133944	0.0734761		163
		K165N-H	124.936	7.932	1160023	15			K165N-H	124.936	7.932	112422	1	0.0969136	0.110129										K165N-H	0.110129			164	W164N-H	0.338258	0.355523	overlap badly with L220/A230			0.338258	0.355523
		Y167N-H	120.451	8.047	3134089	39			Y167N-H	120.513	8.037	815005	8	0.260045	0.295506										Y167N-H	0.295506			165	K165N-H	0.110129					0.110129
		Y168N-H	115.243	7.655	965802	12			Y168N-H	114.955	7.658	278379	3	0.288236	0.327541		Y168N-H	114.955	7.658	23315	0	0.0241406	0.0274325		Y168N-H	0.327541	0.0274325		166
		K169N-H	120.806	7.664	1146601	14			K169N-H	120.806	7.664	-45411	0	-0.0396049	-0.0450056										K169N-H	-0.0450056			167	Y167N-H	0.295506					0.295506
		L170N-H	121.932	7.528	852776	11			L170N-H	121.932	7.528	-53640	1	-0.0629005	-0.0714778										L170N-H	-0.0714778			168	Y168N-H	0.327541	0.0274325				0.327541	0.0274325
		T171N-H	113.825	8.711	1230674	15			T171N-H	113.825	8.711	74600	1	0.0606172	0.0688832		T171N-H	113.825	8.711	79572	1	0.0646573	0.0734742		T171N-H	0.0688832	0.0734742		169	K169N-H	-0.0450056					-0.0450056
		W172N-H	121.948	8.794	1196332	15			W172N-H	121.948	8.794	66430	1	0.0555281	0.0631001		W172N-H	121.948	8.794	238354	3	0.199237	0.226406		W172N-H	0.0631001	0.226406		170	L170N-H	-0.0714778					-0.0714778
		W172NE-HE	129.875	10.187	3724287	47			W172NE-HE	129.875	10.187	478255	5	0.128415	0.145926		W172NE-HE	129.875	10.187	157043	2	0.0421673	0.0479173		W172NE-HE	0.145926	0.0479173		171	T171N-H	0.0688832	0.0734742				0.0688832	0.0734742
		E173N-H	119.012	8.504	1546178	19			E173N-H	119.012	8.504	59347	1	0.038383	0.0436171		E173N-H	119.012	8.504	-10018	0	-0.0064792	-0.00736273		E173N-H	0.0436171	-0.00736273		172	W172N-H	0.0631001	0.226406				0.0631001	0.226406
		E174N-H	120.064	7.714	1208041	15			E174N-H	120.064	7.714	91115	1	0.0754238	0.0857088										E174N-H	0.0857088			173	E173N-H	0.0436171	-0.00736273				0.0436171	-0.00736273
		K175N-H	122.197	8.711	1029410	13			K175N-H	122.197	8.711	71008	1	0.0689793	0.0783856		K175N-H	122.197	8.711	-80025	1	-0.0777387	-0.0883394		K175N-H	0.0783856	-0.0883394		174	E174N-H	0.0857088					0.0857088
		K176N-H	119.028	7.777	1376455	17			K176N-H	119.028	7.777	66015	1	0.0479602	0.0545002		K176N-H	119.028	7.777	161645	2	0.117436	0.13345		K176N-H	0.0545002	0.13345		175	K175N-H	0.0783856	-0.0883394				0.0783856	-0.0883394
		K177N-H	118.647	7.576	1317441	17			K177N-H	118.647	7.576	37744	0	0.0286495	0.0325562		K177N-H	118.647	7.576	184829	2	0.140294	0.159425		K177N-H	0.0325562	0.159425		176	K176N-H	0.0545002	0.13345				0.0545002	0.13345
		F178N-H	121.607	8.236	1522858	19			F178N-H	121.607	8.236	63043	1	0.0413978	0.047043		F178N-H	121.607	8.236	237221	3	0.155774	0.177015		F178N-H	0.047043	0.177015		177	K177N-H	0.0325562	0.159425				0.0325562	0.159425
		D179N-H	121.32	8.792	715404	9			D179N-H	121.32	8.792	70543	1	0.0986058	0.112052		D179N-H	121.32	8.792	199571	2	0.278963	0.317003		D179N-H	0.112052	0.317003		178	F178N-H	0.047043	0.177015				0.047043	0.177015
		E180N-H	122.188	8.286	4035463	51			E180N-H	122.335	8.297	1239542	12	0.307162	0.349048		E180N-H	122.385	8.295	2766377	29	0.685517	0.778996		E180N-H	0.349048	0.778996		179	D179N-H	0.112052	0.317003				0.112052	0.317003
		K181N-H	119.87	7.985	1774223	22			K181N-H	119.87	7.985	210185	2	0.118466	0.13462		K181N-H	120.472	8.056	600228	6	0.338305	0.384437		K181N-H	0.13462	0.384437		180	E180N-H	0.349048	0.778996				0.349048	0.778996
		Q182N-H	119.055	8.148	2649594	33			Q182N-H	119.055	8.148	90264	1	0.0340671	0.0387126										Q182N-H	0.0387126			181	K181N-H	0.13462	0.384437				0.13462	0.384437
		L184N-H	123.557	8.037	225860	3			L184N-H	123.557	8.037	165878	2	0.734428	0.834578		L184N-H	123.651	8.06	507261	5	2.24591	2.55217		L184N-H	0.834578		outlier	182	Q182N-H	0.0387126					0.0387126
		R185N-H	120.744	8.095	2444755	31			R185N-H	120.744	8.095	252062	2	0.103103	0.117163		R185N-H	120.595	8.069	1241472	13	0.50781	0.577057		R185N-H	0.117163	0.577057		183
		A186N-H	122.823	8.133	3388909	43			A186N-H	122.823	8.133	477525	5	0.140908	0.160123		A186N-H	122.823	8.133	1160848	12	0.342543	0.389254		A186N-H	0.160123	0.389254		184	L184N-H	0.834578	2.55217				0.834578	2.55217
		S187N-H	114.209	8.146	1848046	23			S187N-H	114.209	8.146	478435	5	0.258887	0.29419		S187N-H	114.209	8.146	1210933	13	0.65525	0.744603		S187N-H	0.29419	0.744603		185	R185N-H	0.117163	0.577057				0.117163	0.577057
		R188N-H	123.049	8.137	3776588	47			R188N-H	123.049	8.137	73239	1	0.0193929	0.0220374		R188N-H	123.513	8.158	825064	9	0.218468	0.248259		R188N-H	0.0220374	0.248259		186	A186N-H	0.160123	0.389254	overlap with R188 and L209
		I189N-H	120.764	8.061	2722442	34			I189N-H	120.764	8.061	224526	2	0.0824723	0.0937185		I189N-H	120.795	8.054	575499	6	0.211391	0.240217		I189N-H	0.0937185	0.240217		187	S187N-H	0.29419	0.744603	overlap with T205
		R190N-H	122.43	8.145	1778551	22			R190N-H	122.43	8.145	116846	1	0.0656973	0.074656		R190N-H	122.43	8.145	42358	0	0.023816	0.0270637		R190N-H	0.074656	0.0270637		188	R188N-H	0.0220374	0.248259				0.0220374	0.248259
		A191N-H	122.43	8.145	1778551	22			A191N-H	122.43	8.145	116846	1	0.0656973	0.074656		A191N-H	122.368	8.182	383679	4	0.215726	0.245143		A191N-H	0.074656	0.245143		189	I189N-H	0.0937185	0.240217				0.0937185	0.240217
		E192N-H	119.257	8.311	1782182	22			E192N-H	119.257	8.311	217401	2	0.121986	0.13862										E192N-H	0.13862			190	R190N-H	0.074656	0.0270637	overlap at the same spot with A191
		M193N-H	119.32	8.165	3872240	49			M193N-H	119.32	8.165	199840	2	0.0516084	0.0586459		M193N-H	119.263	8.129	633819	7	0.163683	0.186003		M193N-H	0.0586459	0.186003		191	A191N-H	0.074656	0.245143				0.074656	0.245143
		F194N-H	119.787	8.135	2291834	29			F194N-H	119.787	8.135	24185	0	0.0105527	0.0119917		F194N-H	120.141	8.093	458331	5	0.199984	0.227255		F194N-H	0.0119917	0.227255		192	E192N-H	0.13862					0.13862
		A195N-H	123.787	8.09	2195393	28			A195N-H	123.787	8.09	218753	2	0.0996418	0.113229		A195N-H	123.732	8.07	435937	5	0.198569	0.225647		A195N-H	0.113229	0.225647		193	M193N-H	0.0586459	0.186003				0.0586459	0.186003
		K196N-H	119	8.112	2275225	29			K196N-H	119	8.112	30734	0	0.0135081	0.0153501		K196N-H	119.263	8.129	633819	7	0.278574	0.316562		K196N-H	0.0153501	0.316562		194	F194N-H	0.0119917	0.227255				0.0119917	0.227255
		G197N-H	109.389	8.273	1875069	24			G197N-H	109.389	8.273	-5978	0	-0.00318815	-0.0036229		G197N-H	109.389	8.273	137542	1	0.073353	0.0833557		G197N-H	-0.0036229	0.0833557		195	A195N-H	0.113229	0.225647				0.113229	0.225647
		Q198N-H	120.347	8.567	6029044	76			Q198N-H	120.343	8.565	3450502	34	0.572313	0.650356		Q198N-H	120.331	8.573	3017186	32	0.500442	0.568684		Q198N-H	0.650356	0.568684		196	K196N-H	0.0153501	0.316562				0.0153501	0.316562
		V200N-H	120.457	8.109	2665469	34			V200N-H	120.381	8.107	1216659	12	0.456452	0.518696		V200N-H	120.489	8.233	4410273	47	1.6546	1.88022		V200N-H			outlier	197	G197N-H	-0.0036229	0.0833557				-0.0036229	0.0833557
		A201N-H	129.135	8.338	2567186	32			A201N-H	129.135	8.338	-114160	1	-0.0444689	-0.0505329		A201N-H	129.302	8.368	702104	7	0.273492	0.310786		A201N-H	-0.0505329	0.310786		198	Q198N-H	0.650356	0.568684				0.650356	0.568684
		Y203N-H	119.49	8.023	2512385	32			Y203N-H	119.49	8.023	24132	0	0.00960522	0.010915		Y203N-H	119.783	8.071	884529	9	0.352067	0.400077		Y203N-H	0.010915	0.400077		199
		N204N-H	120.38	8.276	3186260	40			N204N-H	120.38	8.276	741114	7	0.232597	0.264315		N204N-H	120.38	8.276	1162270	12	0.364776	0.414518		N204N-H	0.264315	0.414518	outlier	200	V200N-H	0.518696	1.88022				0.518696	1.88022
		T205N-H	114.043	8.13	2682125	34			T205N-H	114.201	8.142	566442	6	0.211191	0.23999		T205N-H	114.217	8.135	1254360	13	0.467674	0.531448		T205N-H	0.23999	0.531448		201	A201N-H	-0.0505329	0.310786				-0.0505329	0.310786
		T206N-H	115.737	8.152	2575970	32			T206N-H	115.976	8.17	563268	5	0.218662	0.24848		T206N-H	115.958	8.161	978852	10	0.379994	0.431811		T206N-H	0.24848	0.431811		202
		Q207N-H	122.278	8.197	2199527	28			Q207N-H	122.304	8.195	278284	3	0.12652	0.143773		Q207N-H	122.368	8.182	383679	4	0.174437	0.198224		Q207N-H	0.143773	0.198224		203	Y203N-H	0.010915	0.400077				0.010915	0.400077
		F208N-H	120.54	8.141	2942304	37			F208N-H	120.794	8.15	716389	7	0.243479	0.276681		F208N-H	120.89	8.164	1130876	12	0.38435	0.436762		F208N-H	0.276681	0.436762		204	N204N-H	0.264315	0.414518	overlap with D235
		L209N-H	122.798	8.077	1727908	22			L209N-H	122.798	8.077	-58378	1	-0.0337854	-0.0383925		L209N-H	123.312	8.131	903146	10	0.522682	0.593957		L209N-H	-0.0383925	0.593957		205	T205N-H	0.23999	0.531448				0.23999	0.531448
		M210N-H	120.857	8.293	8703626	109			M210N-H	120.893	8.3	1521992	15	0.174869	0.198714		M210N-H	120.936	8.296	2530858	27	0.290782	0.330434		M210N-H	0.198714	0.330434		206	T206N-H	0.24848	0.431811				0.24848	0.431811
		D211N-H	121.478	8.315	3902068	49			D211N-H	121.591	8.354	549904	5	0.140926	0.160144		D211N-H	121.647	8.331	1669691	18	0.427899	0.486249		D211N-H	0.160144	0.486249		207	Q207N-H	0.143773	0.198224				0.143773	0.198224
		D212N-H	120.882	8.329	4856036	61			D212N-H	121.045	8.347	1278510	12	0.263283	0.299185		D212N-H	121.096	8.347	2995632	32	0.616888	0.701009		D212N-H	0.299185	0.701009		208	F208N-H	0.276681	0.436762				0.276681	0.436762
		H213N-H	118.639	8.417	4626233	58			H213N-H	118.603	8.427	1251342	12	0.270488	0.307373		H213N-H	118.603	8.427	2793596	30	0.60386	0.686204		H213N-H	0.307373	0.686204		209	L209N-H	-0.0383925	0.593957				-0.0383925	0.593957
		D214N-H	121.129	8.454	3551340	45			D214N-H	121.256	8.474	1024879	10	0.288589	0.327942		D214N-H	121.253	8.474	2151725	23	0.605891	0.688513		D214N-H	0.327942	0.688513		210	M210N-H	0.198714	0.330434				0.198714	0.330434
		Q215N-H	119.889	8.315	4029060	51			Q215N-H	120.021	8.334	1323104	13	0.32839	0.373171		Q215N-H	120.007	8.328	2468973	26	0.612791	0.696354		Q215N-H	0.373171	0.696354		211	D211N-H	0.160144	0.486249				0.160144	0.486249
		E216N-H	121.782	8.391	3938980	50			E216N-H	121.782	8.391	470419	5	0.119427	0.135712		E216N-H	121.986	8.4	2480607	26	0.629759	0.715635		E216N-H	0.135712	0.715635		212	D212N-H	0.299185	0.701009	overlap with K232
		E217N-H	123.081	8.462	4044252	51			E217N-H	123.081	8.462	640977	6	0.158491	0.180103		E217N-H	123.31	8.48	2248548	24	0.555986	0.631802		E217N-H	0.180103	0.631802		213	H213N-H	0.307373	0.686204				0.307373	0.686204
		D219N-H	120.093	8.434	3640284	46			D219N-H	120.164	8.453	872121	9	0.239575	0.272244		D219N-H	120.158	8.451	2097665	22	0.576237	0.654814		D219N-H	0.272244	0.654814		214	D214N-H	0.327942	0.688513				0.327942	0.688513
		L220N-H	123.423	8.234	8505349	107			L220N-H	123.471	8.243	3299183	32	0.387895	0.44079		L220N-H	123.485	8.241	6547958	69	0.769864	0.874845		L220N-H	0.44079	0.874845		215	Q215N-H	0.373171	0.696354				0.373171	0.696354
		K221N-H	120.424	8.393	3666189	46			K221N-H	120.622	8.403	808726	8	0.22059	0.250671		K221N-H	120.649	8.396	2006768	21	0.547372	0.622013		K221N-H	0.250671	0.622013		216	E216N-H	0.135712	0.715635				0.135712	0.715635
		T222N-H	112.442	8.023	3086526	39			T222N-H	112.352	8.031	463353	5	0.150121	0.170592		T222N-H	112.846	8.031	1796062	19	0.581904	0.661255		T222N-H	0.170592	0.661255		217	E217N-H	0.180103	0.631802				0.180103	0.631802
		G223N-H	110.723	8.356	3267578	41			G223N-H	110.768	8.369	818472	8	0.250483	0.28464		G223N-H	110.762	8.37	1618430	17	0.4953	0.56284		G223N-H	0.28464	0.56284		218
		L224N-H	121.447	8.011	3872462	49			L224N-H	121.531	8.019	955038	9	0.246623	0.280253		L224N-H	121.554	8.015	1909404	20	0.493072	0.56031		L224N-H	0.280253	0.56031		219	D219N-H	0.272244	0.654814				0.272244	0.654814
		Y225N-H	119.899	8.258	3762341	47			Y225N-H	120.016	8.247	1004314	10	0.266939	0.303339		Y225N-H	120.03	8.239	2030502	22	0.539691	0.613285		Y225N-H	0.303339	0.613285		220	L220N-H	0.44079	0.874845	overlap with A230
		S226N-H	116.971	8.139	2963681	37			S226N-H	117.128	8.124	727810	7	0.245576	0.279064		S226N-H	117.11	8.113	1386319	15	0.467769	0.531556		S226N-H	0.279064	0.531556		221	K221N-H	0.250671	0.622013				0.250671	0.622013
		K227N-H	123.384	8.324	4116045	52			K227N-H	123.384	8.324	1009038	10	0.245147	0.278577		K227N-H	123.467	8.311	2068642	22	0.50258	0.571114		K227N-H	0.278577	0.571114		222	T222N-H	0.170592	0.661255				0.170592	0.661255
		R228N-H	122.105	8.211	3194627	40			R228N-H	122.428	8.242	648518	6	0.203003	0.230685		R228N-H	122.382	8.232	1097074	12	0.343412	0.390241		R228N-H	0.230685	0.390241		223	G223N-H	0.28464	0.56284				0.28464	0.56284
		A229N-H	125.444	8.333	4241487	53			A229N-H	125.614	8.349	984726	10	0.232165	0.263824		A229N-H	125.634	8.348	2647542	28	0.624201	0.70932		A229N-H	0.263824	0.70932		224	L224N-H	0.280253	0.56031				0.280253	0.56031
		A230N-H	123.32	8.224	9278089	117			A230N-H	123.32	8.224	1246764	12	0.134377	0.152701		A230N-H	123.32	8.224	937430	10	0.101037	0.114815		A230N-H	0.152701	0.114815		225	Y225N-H	0.303339	0.613285				0.303339	0.613285
		K232N-H	120.882	8.329	4856036	61			K232N-H	121.07	8.349	1326426	13	0.27315	0.310398		K232N-H	121.096	8.347	2995632	32	0.616888	0.701009		K232N-H	0.310398	0.701009		226	S226N-H	0.279064	0.531556				0.279064	0.531556
		S233N-H	117.2	8.406	3457748	43			S233N-H	117.471	8.445	995764	10	0.287981	0.327251		S233N-H	117.513	8.449	2580341	27	0.746249	0.84801		S233N-H	0.327251	0.84801		227	K227N-H	0.278577	0.571114				0.278577	0.571114
		D234N-H	122.173	8.415	5514442	69			D234N-H	122.173	8.415	1596214	16	0.289461	0.328933		D234N-H	122.173	8.422	3221844	34	0.584256	0.663927		D234N-H	0.328933	0.663927		228	R228N-H	0.230685	0.390241				0.230685	0.390241
		D235N-H	120.517	8.298	6295884	79			D235N-H	120.463	8.301	1902415	19	0.302168	0.343373		D235N-H	120.399	8.297	3136296	33	0.49815	0.56608		D235N-H	0.343373	0.56608		229	A229N-H	0.263824	0.70932				0.263824	0.70932
		T236N-H	114.023	8.187	4669144	59			T236N-H	114.073	8.181	1678430	16	0.359473	0.408492		T236N-H	114.121	8.17	3407684	36	0.729831	0.829353		T236N-H	0.408492	0.829353		230	A230N-H	0.152701	0.114815	overlap with L220
		S237N-H	118.355	8.422	5088911	64			S237N-H	118.413	8.428	1812925	18	0.35625	0.40483		S237N-H	118.452	8.428	3886061	41	0.763633	0.867765		S237N-H	0.40483	0.867765		231
		D238N-H	122.712	8.451	6344250	80			D238N-H	122.712	8.451	2942988	29	0.463883	0.527139		D238N-H	122.798	8.46	6328524	67	0.997521	1.13355		D238N-H	0.527139	1.13355		232	K232N-H	0.310398	0.701009	overlap with D212
		D239N-H	120.34	8.227	6879670	87			D239N-H	120.429	8.232	2350489	23	0.341657	0.388247		D239N-H	120.529	8.242	4647156	49	0.675491	0.767604		D239N-H	0.388247	0.767604		233	S233N-H	0.327251	0.84801				0.327251	0.84801
		D240N-H	120.34	8.227	6879670	87			D240N-H	120.429	8.232	2350489	23	0.341657	0.388247		D240N-H	120.529	8.242	4647156	49	0.675491	0.767604		D240N-H	0.388247	0.767604		234	D234N-H	0.328933	0.663927				0.328933	0.663927
		F241N-H	119.851	8.092	3838646	48			F241N-H	119.797	8.081	732241	7	0.190755	0.216767		F241N-H	120.511	8.108	3574958	38	0.931307	1.0583		F241N-H	0.216767	1.0583		235	D235N-H	0.343373	0.56608	overlap with N204
		M242N-H	121.792	8.167	2704085	34			M242N-H	121.843	8.182	356056	3	0.131673	0.149629		M242N-H	122.978	8.129	2759725	29	1.02058	1.15975		M242N-H	0.149629		merged with A186	236	T236N-H	0.408492	0.829353				0.408492	0.829353
		E243N-H	122.955	8.397	8482497	107			E243N-H	122.983	8.39	4107662	40	0.484252	0.550286		E243N-H	122.965	8.372	3344531	35	0.394286	0.448052		E243N-H	0.550286	0.448052		237	S237N-H	0.40483	0.867765				0.40483	0.867765
		E244N-H	122.41	8.558	3909503	49			E244N-H	122.217	8.557	749530	7	0.19172	0.217864		E244N-H	122.785	8.562	3352406	36	0.857502	0.974434		E244N-H	0.217864	0.974434		238	D238N-H	0.527139	1.13355	overlap with R146
		G245N-H	110.45	8.575	3499841	44			G245N-H	110.587	8.589	1039010	10	0.296873	0.337356		G245N-H	110.653	8.588	3317087	35	0.947782	1.07703		G245N-H	0.337356	1.07703		239	D239N-H	0.388247	0.767604	overlap with D340
		G246N-H	108.841	8.359	4697860	59			G246N-H	108.841	8.359	647997	6	0.137935	0.156744		G246N-H	108.841	8.359	149512	2	0.0318256	0.0361654		G246N-H	0.156744		merged with G251	240	D240N-H	0.388247	0.767604	overlap with D239
		E247N-H	120.551	8.523	5795520	73			E247N-H	120.595	8.519	1955117	19	0.33735	0.383352		E247N-H	120.641	8.511	4268116	45	0.736451	0.836876		E247N-H	0.383352	0.836876		241	F241N-H	0.216767	1.0583				0.216767	1.0583
		E248N-H	121.766	8.63	4940180	62			E248N-H	121.766	8.63	632886	6	0.12811	0.145579		E248N-H	122.114	8.617	4298658	46	0.870142	0.988798		E248N-H	0.145579	0.988798		242	M242N-H	0.149629	1.15975				0.149629	1.15975
		D249N-H	121.659	8.423	5055298	64			D249N-H	121.659	8.423	629003	6	0.124425	0.141391		D249N-H	121.962	8.458	4142111	44	0.81936	0.931091		D249N-H	0.141391	0.931091		243	E243N-H	0.550286	0.448052	overlap with R162/E243
		G250N-H	109.828	8.442	4634844	58			G250N-H	110.03	8.457	1549715	15	0.334362	0.379957		G250N-H	110.076	8.462	3969095	42	0.85636	0.973136		G250N-H	0.379957	0.973136		244	E244N-H	0.217864	0.974434				0.217864	0.974434
		G251N-H	109.01	8.375	7738534	97			G251N-H	109.033	8.377	2823960	28	0.364922	0.414684		G251N-H	109.077	8.377	5961322	63	0.770343	0.875389		G251N-H	0.414684	0.875389		245	G245N-H	0.337356	1.07703				0.337356	1.07703
		S252N-H	115.694	8.314	6645340	84			S252N-H	115.711	8.316	2246780	22	0.338099	0.384203		S252N-H	115.757	8.315	4014019	43	0.604035	0.686404		S252N-H	0.384203	0.686404		246	G246N-H	0.156744	0.0361654	overlap with G251 a bit
		D253N-H	127.649	8.128	7711452	97			D253N-H	127.667	8.126	2660445	26	0.344999	0.392045		D253N-H	127.7	8.118	4185808	44	0.542804	0.616823		D253N-H	0.392045	0.616823		247	E247N-H	0.383352	0.836876				0.383352	0.836876
																									AVG	0.251403	0.484693		248	E248N-H	0.145579	0.988798				0.145579	0.988798
																									STD	0.193265	0.29629		249	D249N-H	0.141391	0.931091				0.141391	0.931091
																									AVG-STD	0.0581387	0.188403		250	G250N-H	0.379957	0.973136				0.379957	0.973136
																									AVG_0.5STD	0.154771	0.336548		251	G251N-H	0.414684	0.875389				0.414684	0.875389
																													252	S252N-H	0.384203	0.686404				0.384203	0.686404
																													253	D253N-H	0.392045	0.616823				0.392045	0.616823
																														W164NE-HE	0.133944	0.0734761				0.133944	0.0734761
																														W172NE-HE	0.145926	0.0479173				0.145926	0.0479173

## Sheet: Fig5A, SL1-dII CSP
SL1-dII CSP 04132017		SL1-dII 1.24mM 15C 800MHz NOESY-11echo 0mM KCl NMR buffer											SL1-dII 0.4mM + BR-L 0.4mM 15C 800MHz NOESY-11echo 0mM KCl NMR buffer				All nts				All nts no space
Numbers updated from resonance list with 3 digit after decimal point			H1	H1'	H22	H3	H41	H42	H5	H6	H8			H1	H3			∆H1	∆H3			∆H1	∆H3	∆H5	∆H6
+ BR-L		G28'	13.431	-	-	-	-	-	-	-	-										G27'
Fig. 5A			0.0008	-	-	-	-	-	-	-	-										G28'
		C29	-	-	-	-	8.54	6.992	5.224	7.569	-										C29			0.004	0.096
			-	-	-	-	0.0679	0	0	0	-										U30		0.11	0.054	0.058
		U30'	-	-	-	11.776	-	-	-	-	-										G31	0.109
			-	-	-	0.0022	-	-	-	-	-										U32		0.085	0.155	0.035
		U30	-	-	-	11.741	-	-	5.707	7.767	-		U30	-	11.851				0.11		C33			0.023	0.095
			-	-	-	0.0004	-	-	0	0	-			-	0.0046						A34
		G31	12.993	-	-	-	-	-	-	-	-		G31	12.884	-			0.109			C35			0.022	0.024
			0.0012	-	-	-	-	-	-	-	-			0.0025	-						C36			0.082	0.028
		U32	-	-	-	12.123	-	-	5.686	7.736	-		U32	-	12.038				0.085		U37'			0.002	0.007
			-	-	-	0.0038	-	-	0	0	-			-	0.0035						U38'			0.01	0.007
		C33	-	-	-	-	8.171	6.898	5.619	7.893	-										C39'			0.014	0.002
			-	-	-	-	0.001	0.0005	0.0005	0	-										G40'	0.003
		C35	-	-	-	-	8.532	7.113	5.397	7.576	-										G73	0.005
			-	-	-	-	0.0005	0	0.0005	0	-										G74	0.001
		C36	-	-	-	-	8.523	6.865	5.439	7.746	-										C75			0.012	0
			-	-	-	-	0	0.0005	0.007	0	-										U76			0.016	0.017
		U37'	-	-	-	-	-	-	5.827	7.739	-										A77
			-	-	-	-	-	-	0	0	-										G78	0.147
		U38'	-	-	-	-	-	-	5.854	8.017	-										G79	0.044
			-	-	-	-	-	-	0	0	-										C80			0.029	0.016
		C39'	-	-	-	-	-	-	6.114	7.684	-										G81	0.108
			-	-	-	-	-	-	0	0	-										G82	0.055
		G40'	9.854	5.957	-	-	-	-	-	-	7.858		G40'	9.851	-			0.003			C83'			0.041	0.025
			0.0014	0	-	-	-	-	-	-	0			0	-						C84'
		G73	12.936	-	-	-	-	-	-	-	-		G73	12.941	-			0.005
			0.0023	-	-	-	-	-	-	-	-			0.0015	-						AVG for all	0.0428056
		G74	13.054	-	-	-	-	-	-	-	-		G74	13.053	-			0.001			STD for all	0.0437165
			0.0004	-	-	-	-	-	-	-	-			0.0005	-						AVG+STD for all	0.0865221
		C75	-	-	-	-	8.365	7.06	5.545	7.687	-										AVG+0.5STD for all	0.0646638
			-	-	-	-	0.001	0	0.003	0	-
		U76	-	-	-	-	-	-	5.443	7.642	-
			-	-	-	-	-	-	0	0	-
		G78	12.406	-	-	-	-	-	-	-	-		G78	12.259	-			0.147
			0.0009	-	-	-	-	-	-	-	-			0.0029	-
		G79	11.415	-	6.383	-	-	-	-	-	-		G79	11.459	-			0.044
			0.0017	-	0.0005	-	-	-	-	-	-			0.0022	-
		C80	-	-	-	-	8.358	6.956	5.363	7.604	-
			-	-	-	-	0.0004	0.0005	0.0005	0	-
		G81	10.401	-	-	-	-	-	-	-	-		G81	10.293	-			0.108
			0.001	-	-	-	-	-	-	-	-			0.003	-
		G82	13.431	-	-	-	-	-	-	-	-		G82	13.376	-			0.055
			0.0016	-	-	-	-	-	-	-	-			0.0072	-
		C83	-	-	-	-	8.59	6.929	5.221	7.632	-
			-	-	-	-	0.0676	0.0008	0.0016	0	-
		SL1-dII 1.24mM 15C 800MHz TOCSY 0mM KCl NMR buffer											SL1-dII 0.4mM + BR-L 0.4mM 15C 800MHz TOCSY 0mM KCl NMR buffer
			H5	H6										H5	H6			∆H5	∆H6
		C29	5.233	7.574									C29	5.229	7.478			0.004	0.096
		U30	5.714	7.772									U30	5.66	7.83			0.054	0.058
		U32	5.698	7.741									U32	5.543	7.706			0.155	0.035
		C33	5.625	7.898									C33	5.648	7.993			0.023	0.095
		C35	5.402	7.581									C35	5.38	7.557			0.022	0.024
		C36	5.45	7.751									C36	5.368	7.723			0.082	0.028
		U37'	5.833	7.744									U37'	5.835	7.737			0.002	0.007
		U38'	5.861	8.022									U38'	5.851	8.015			0.01	0.007
		C39'	6.12	7.687									C39'	6.106	7.685			0.014	0.002
		C75	5.554	7.692									C75	5.542	7.692			0.012	0
		U76	5.442	7.648									U76	5.426	7.665			0.016	0.017
		C80	5.369	7.609									C80	5.398	7.593			0.029	0.016
		C83	5.231	7.638									C83	5.19	7.663			0.041	0.025

## Sheet: Fig5A, SL1-d CSP
SL1-d CSP 03082019		SL1-d 0.25mM 15C 600MHz NOESY-11Echo 150mM KCl NMR buffer							SL1-d 0.16mM + BR-ARM1 0.16mM 15C 600MHz NOESY-11Echo 150mM KCl NMR buffer								DeltaCSP				All nucleotides
Numbers updated from resonance list with 3 digit after decimal point
+ BR-ARM1			H1	H2	H3	H5	H6			H1	H2	H3	H5	H6			∆H1	∆H2	∆H3				∆H1	∆H2	∆H3
Fig. 5A		G25	12.728	-	-	-	-		G25	12.728	-	-	-	-		G25	0				G24'
		G26	12.349	-	-	-	-		G26	12.344	-	-	-	-		G26	0.005				G25'	G25	0
		A27	-	7.886	-	-	-		A27	-	7.886	-	-	-		A27		0			G26	G26	0.005
		U28	-	-	12.02	5.325	7.592		U28	-	-	12.013	5.326	7.59		U28			0.007		A27	A27		0
		U30	-	-	11.715	-	-		U30	-	-	11.71	-	-		U30			0.005		U28	U28			0.007
		G31	12.96	-	-	-	-		G31	12.956	-	-	-	-		G31	0.004				C29
		U32	-	-	12.252	-	-		U32	-	-	12.241	-	-		U32			0.011		U30	U30			0.005
		C35	-	-	-	5.215	7.487									C35					G31	G31	0.004
		U41	-	-	-	5.955	7.865		U41	-	-	-	5.947	7.859		U41					U32	U32			0.011
		G42	12.505	-	-	-	-		G42	12.524	-	-	-	-		G42	0.019				C33
		A43	-	7.815	-	-	-		A43	-	7.899	-	-	-		A43		0.084			A34
		U44	-	-	14.161	4.987	7.64		U44	-	-	14.141	4.954	7.623		U44			0.02		C35	C35
		C47	-	-	-	5.247	7.775		C47	-	-	-	5.234	7.774		C47					C36
		U50	-	-	-	5.854	8.016		U50	-	-	-	5.847	8.012		U50					C37
		C51	-	-	-	6.122	7.684		C51	-	-	-	6.12	7.681		C51					C38
		G52'	9.856	-	-	-	-		G52'	9.85	-	-	-	-		G52'	0.006				A39
		G60	12.915	-	-	-	-		G60	12.879	-	-	-	-		G60	0.036				U40
		G61	13.178	-	-	-	-		G61	13.141	-	-	-	-		G61	0.037				U41	U41
		C62	-	-	-	5.247	7.775		C62	-	-	-	5.234	7.774		C62					G42	G42	0.019
		U63	-	-	-	5.827	7.864		U63	-	-	-	5.841	7.857		U63					A43	A43		0.084
		G64	12.302	-	-	-	-		G64	12.152	-	-	-	-		G64	0.15				U44	U44			0.02
		A65	-	7.8	-	-	-		A65	-	7.899	-	-	-		A65		0.099			C45
		U66	-	-	14.059	4.969	7.64		U66	-	-	14.134	4.953	7.623		U66			0.075		G46
		C71	-	-	-	6.002	7.748									C71					C47	C47
		G73	12.631	-	-	-	-		G73	12.613	-	-	-	-		G73	0.018				C48
		G74	13.364	-	-	-	-		G74	Not sure	-	-	-	-		G74					U49'
		G78	12.333						G78	12.372						G78	0.039				U50'	U50
		G79	11.423	-	-	-	-		G79	11.426	-	-	-	-		G79	0.003				C51'	C51
		C80	-	-	-	5.325	7.592		C80	-	-	-	5.326	7.59		C80					G52'	G52'	0.006
		G81	10.302	-	-	-	-		G81	10.302	-	-	-	-		G81	0				G60	G60	0.036
		G82	12.825	-	-	-	-		G82	12.817	-	-	-	-		G82	0.008				G61	G61	0.037
		G83	11.544	-	-	-	-		G83	11.538	-	-	-	-		G83	0.006				C62	C62
		U84	-	-	14.374	5.215	7.487		U84	-	-	14.372	-	-		U84			0.002		U63	U63
		C85	-	-	-	5.612	7.952		C85	-	-	-	5.607	7.949		C85					G64	G64	0.15
																					A65	A65		0.099
																AVG	0.0275652				U66	U66			0.075
																STD	0.0388246				C67
																AVG+STD	0.0663898				U68
																AVG+0.5STD	0.0469775				G69
																					G70
																					C71	C71
																					U72
																					G73	G73	0.018
																					G74	G74
																					C75
																					U76
																					A77
																					G78	G78	0.039
																					G79	G79	0.003
																					C80	C80
																					G81	G81	0
																					G82	G82	0.008
																					G83	G83	0.006
																					U84	U84			0.002
																					C85	C85
																					C86'
																					C87'

[truncated: 7 more sheets: Fig5A, SL1-dIIm CSP, Fig5A, SL1-p CSP, Fig5A, SL1-mp CSP, Fig5A, SL1-pII CSP, Fig5D, SL1alt CSP, FigS9_BR-L-AR-CSP,intens_SL1-dI, Fig6_BR-L-AR-CSP_PKA-3hr]
